# Supplementary material for: How Do Cancer-Related Mutations Affect the Oligomerisation State of the p53 Tetramerisation Domain?
Source: MDPI journal article supplement (doi:10.3390/cimb45060317), 2023-06-07
Supplement: s1 [file s1]

# Supplementary Material

## How do cancer-related mutations affect the oligomerisation state of the p53 tetramerisation domain?

Federica Nicolini<sup>1</sup>, Toni Todorovski<sup>1,2,§</sup>, Eduard Puig<sup>1</sup>, Mireia Diaz-Lobo<sup>1</sup>, Marta Vilaseca<sup>1</sup>, Jesús García<sup>1</sup>, David Andreu<sup>2</sup>, Ernest Giralt<sup>1,3,\*</sup>

<sup>1</sup> Institute for Research in Biomedicine (IRB Barcelona), Baldri Reixac 10, 08028 Barcelona, Spain

<sup>2</sup> Department of Experimental and Health Sciences, Universitat Pompeu Fabra, Barcelona Biomedical Research Park, Dr. Aiguader 88, 08003 Barcelona, Spain

<sup>§</sup> Current affiliation: University of Rijeka, Department of Biotechnology, 51000 Rijeka, Croatia

<sup>3</sup> Department of Inorganic and Organic Chemistry, University of Barcelona, Martí i Franquès, 1-11, 08028 Barcelona, Spain

| 37TDs                            | Molecular formula                                                                   | Calc. MW   | Found MW <sup>a</sup> | tr UPLC or HPLC min | % Purity <sup>b</sup> |
|----------------------------------|-------------------------------------------------------------------------------------|------------|-----------------------|---------------------|-----------------------|
| <b>37TD-WT (not labelled)</b>    | C <sub>197</sub> H <sub>312</sub> O <sub>59</sub> N <sub>56</sub> S                 | 4438,28559 | 4438,28981            | 16,722              | > 95                  |
| <b>37TD-WT</b>                   | C <sub>196</sub> <sup>13</sup> C H <sub>312</sub> O <sub>59</sub> N <sub>56</sub> S | 4439,28894 | 4439,29224            | 16,881              | > 95                  |
| <b>37TD-R337H (not labelled)</b> | C <sub>197</sub> H <sub>307</sub> O <sub>59</sub> N <sub>55</sub> S                 | 4419,24339 | 4419,24725            | 16,625              | > 95                  |
| <b>37TD-R337H</b>                | C <sub>196</sub> <sup>13</sup> C H <sub>307</sub> O <sub>59</sub> N <sub>55</sub> S | 4420,24674 | 4420,25107            | 16,656              | > 95                  |
| <b>37TD-D352H</b>                | C <sub>198</sub> <sup>13</sup> C H <sub>314</sub> O <sub>57</sub> N <sub>58</sub> S | 4461,32091 | 4461,32512            | 9,210               | > 95                  |
| <b>37TD-R342L</b>                | C <sub>196</sub> <sup>13</sup> C H <sub>311</sub> O <sub>59</sub> N <sub>53</sub> S | 4396,27189 | 4396,27627            | 10,036              | 85                    |
| <b>37TD-T329I</b>                | C <sub>198</sub> <sup>13</sup> C H <sub>316</sub> O <sub>58</sub> N <sub>56</sub> S | 4451,32533 | 4451,33161            | 9,770               | 90                    |
| <b>37TD-L344R</b>                | C <sub>196</sub> <sup>13</sup> C H <sub>313</sub> O <sub>59</sub> N <sub>59</sub> S | 4482,30599 | 4482,31032            | 8,489               | > 95                  |
| <b>37TD-L344P</b>                | C <sub>195</sub> <sup>13</sup> C H <sub>308</sub> O <sub>59</sub> N <sub>56</sub> S | 4423,25764 | 4423,25888            | 8,634               | 86                    |

**Table S1.** Molecular weight, retention times and purity of the synthetic peptides. <sup>a</sup>Measured by LQT-FT MS. <sup>b</sup>Measured by UPLC for 37TD-WT and 37TD-R337H sequences (either labelled or not) and by HPLC for the other 37TDs. A gradient of 0 – 70 % acetonitrile in water in 40 min was applied in the UPLC while a gradient of 5 – 60 % acetonitrile in water in 15 min was used in the HPLC.

| 37TDs   |                        |            |                           |            |            |            |            |            |         |
|---------|------------------------|------------|---------------------------|------------|------------|------------|------------|------------|---------|
|         | 37TD-WT (not labelled) | 37TD-WT    | 37TD-R337H (not labelled) | 37TD-R337H | 37TD-D352H | 37TD-R342L | 37TD-T329I | 37TD-L344R |         |
| Charges | +1                     | 4442,01    | 4443,01                   | 4422,96    | 4423,96    | 4465,08    | 4399,99    | 4455,08    | 4486,05 |
|         | +2                     | 2221,51    | 2222,00                   | 2211,98    | 2212,48    | 2233,04    | 2200,50    | 2228,04    | 2243,53 |
|         | +3                     | 1481,34    | 1481,67                   | 1474,99    | 1475,32    | 1489,02    | 1467,33    | 1485,69    | 1496,02 |
|         | +4                     | 1111,25    | 1111,50                   | 1106,49    | 1106,74    | 1117,02    | 1100,75    | 1114,52    | 1122,26 |
|         | +5                     | 889,20     | 889,40                    | 885,39     | 885,59     | 893,82     | 880,80     | 891,82     | 898,01  |
|         | +6                     | 741,17     | 741,34                    | 737,99     | 738,16     | 745,01     | 734,16     | 743,35     | 748,51  |
|         | +7                     | 635,43     | 635,57                    | 632,71     | 632,85     | 638,72     | 629,43     | 637,30     | 641,72  |
|         | +8                     | 556,13     | 556,25                    | 553,74     | 553,87     | 559,01     | 550,87     | 557,76     | 561,63  |
| Charges |                        | 37TD-L344P |                           |            |            |            |            |            |         |
|         | +1                     | 4426,98    |                           |            |            |            |            |            |         |
|         | +2                     | 2213,99    |                           |            |            |            |            |            |         |
|         | +3                     | 1476,33    |                           |            |            |            |            |            |         |
|         | +4                     | 1107,50    |                           |            |            |            |            |            |         |
|         | +5                     | 886,20     |                           |            |            |            |            |            |         |
|         | +6                     | 738,66     |                           |            |            |            |            |            |         |
|         | +7                     | 633,28     |                           |            |            |            |            |            |         |
|         | +8                     | 554,25     |                           |            |            |            |            |            |         |

**Table S2.** Masses over charges (m/z) of the 37TDs.

37TD-WT: Ac-KKPLDGEYFTLQIRGRERFEMFRELNEALELKDAQAG-NH<sub>2</sub>

A

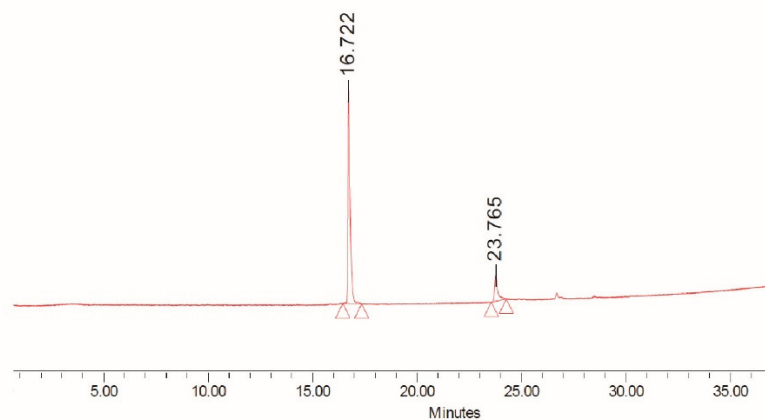

B

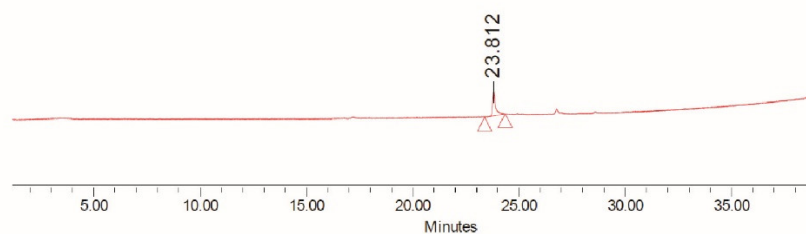

C

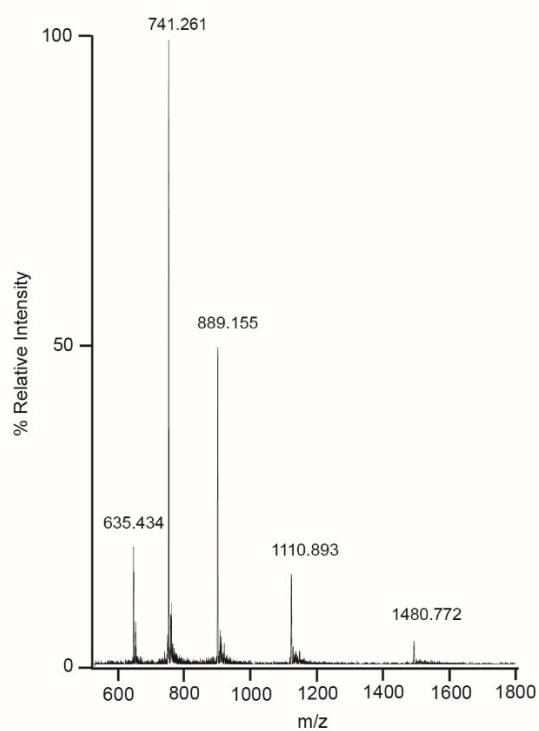

**Figure S1.** UPLC (A, B) and UPLC-MS (C) of unlabelled 37TD-WT (A and C) and a blank run (B). Gradient of 0 – 70 % acetonitrile in water in 40 min.

37TD-WT: Ac-KKPLDGEYFTLQIRGRERFEMFRELNEALELKDAQAG-NH<sub>2</sub>  
M <sup>13</sup>C-methyl methionine

A

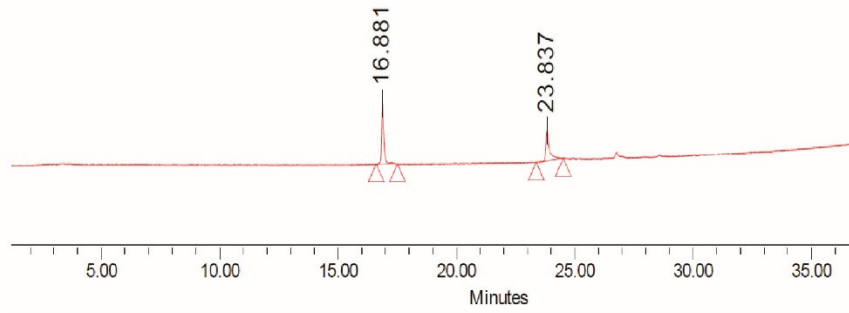

B

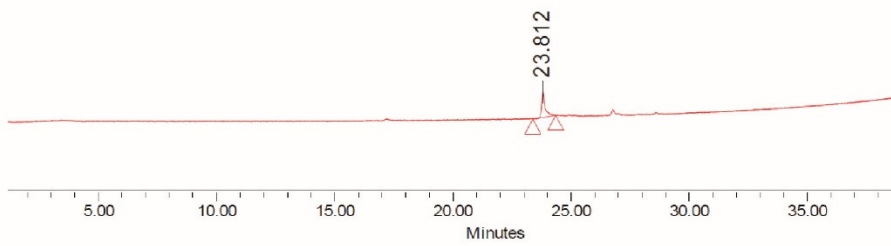

C

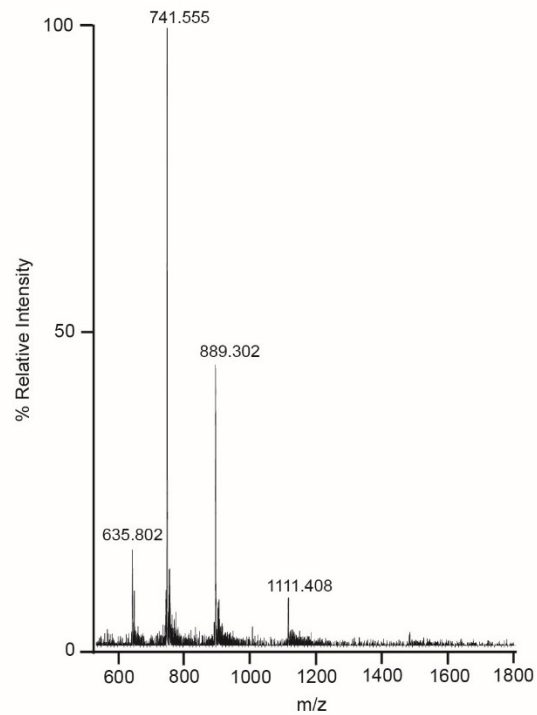

**Figure S2.** UPLC (A, B) and UPLC-MS (C) of 37TD-WT (A and C) and a blank run (B). Gradient of 0 – 70 % acetonitrile in water in 40 min.

37TD-R337H: Ac-KKPLDGEYFTLQIRGREHFEMFRELNEALELKDAQAG-NH<sub>2</sub>

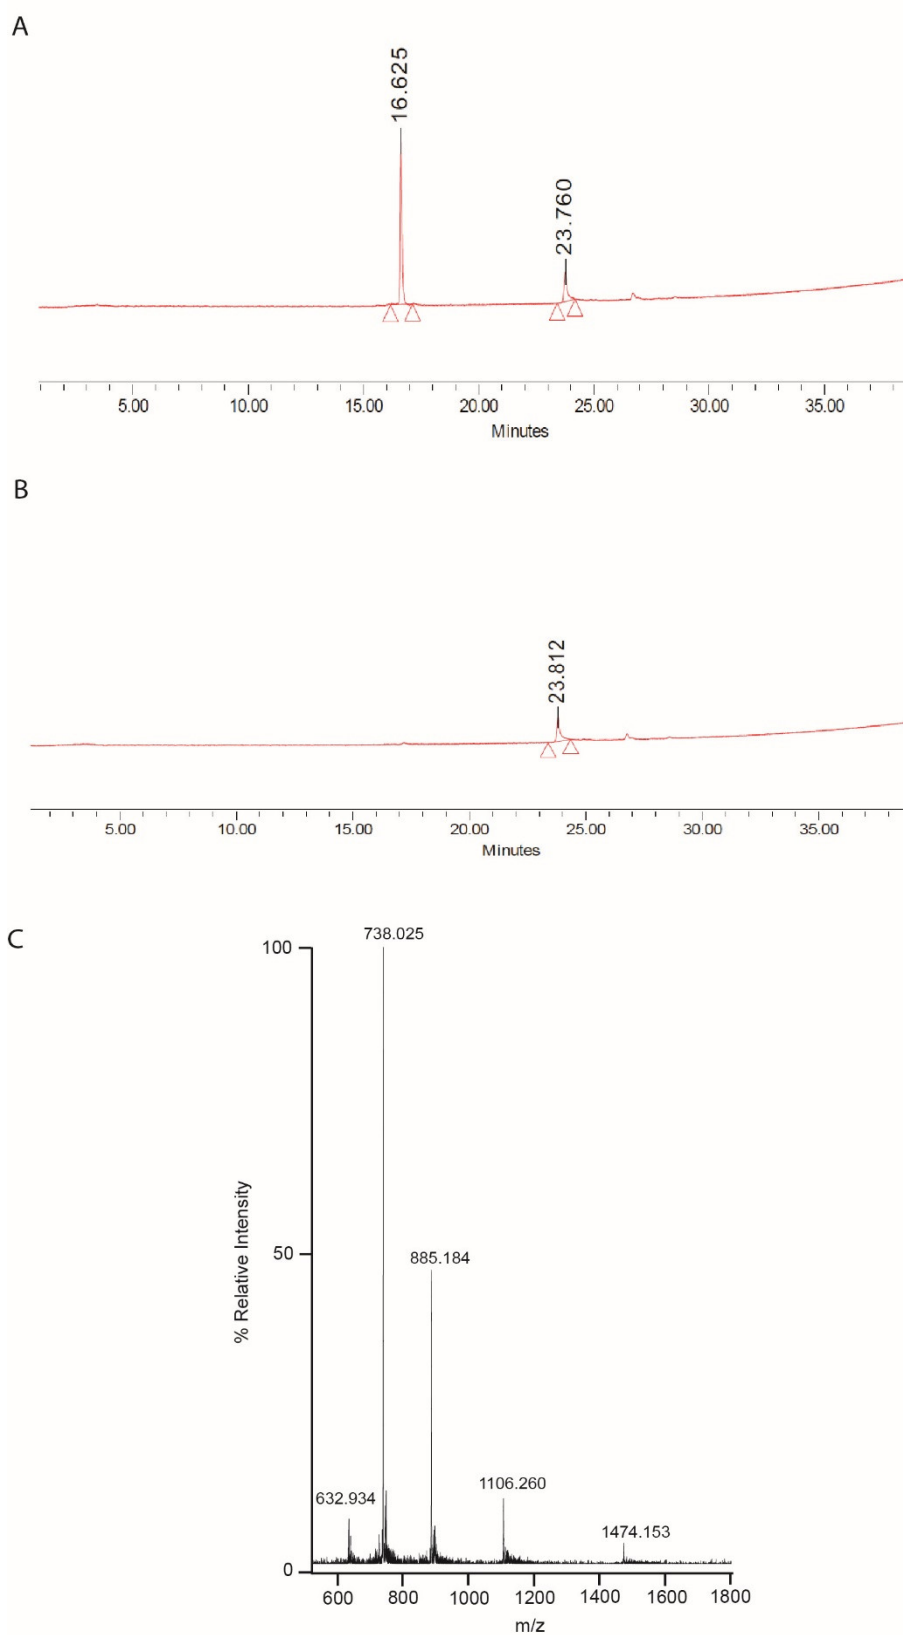

**Figure S3.** UPLC (A, B) and UPLC-MS (C) of unlabelled 37TD-R337H (A and C) and a blank run (B).  
Gradient of 0 – 70 % acetonitrile in water in 40 min.

37TD-R337H: Ac-KKPLDGEYFTLQIRGREHFE<sup>M</sup>FRELNEALELKDAQAG-NH<sub>2</sub>

<sup>M</sup> <sup>13</sup>C-methyl methionine

A

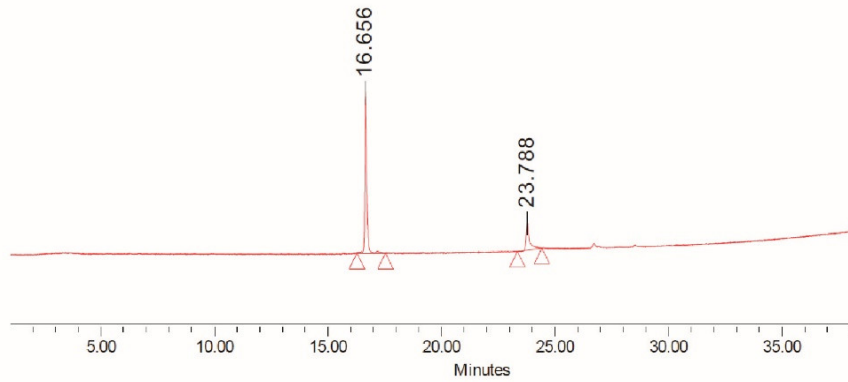

B

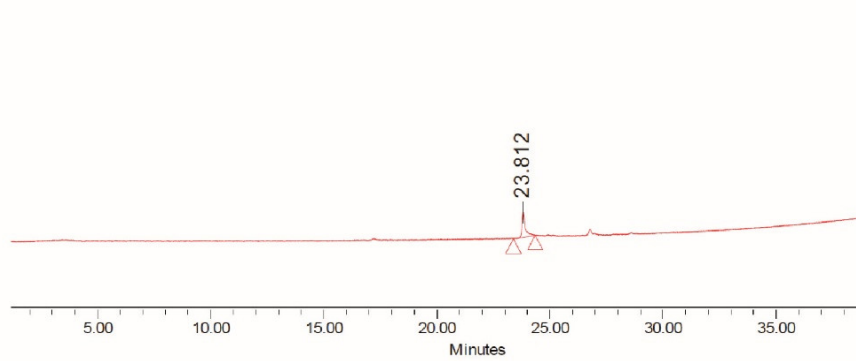

C

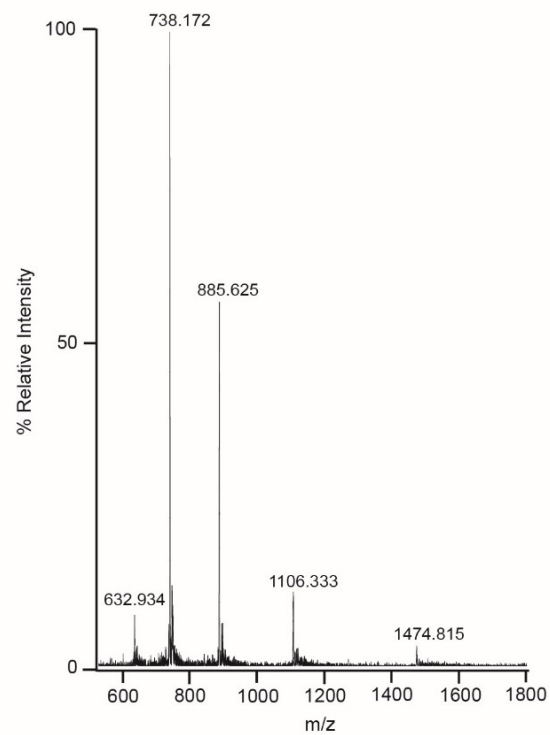

**Figure S4.** UPLC (A, B) and UPLC-MS (C) of 37TD-R337H (A and C) and a blank run (B). Gradient of 0 – 70 % acetonitrile in water in 40 min.

37TD-D352H: Ac-KKPLDGEYFTLQIRGRERFEMFRELNEALELKHAQAG-NH<sub>2</sub>

M <sup>13</sup>C-methyl methionine

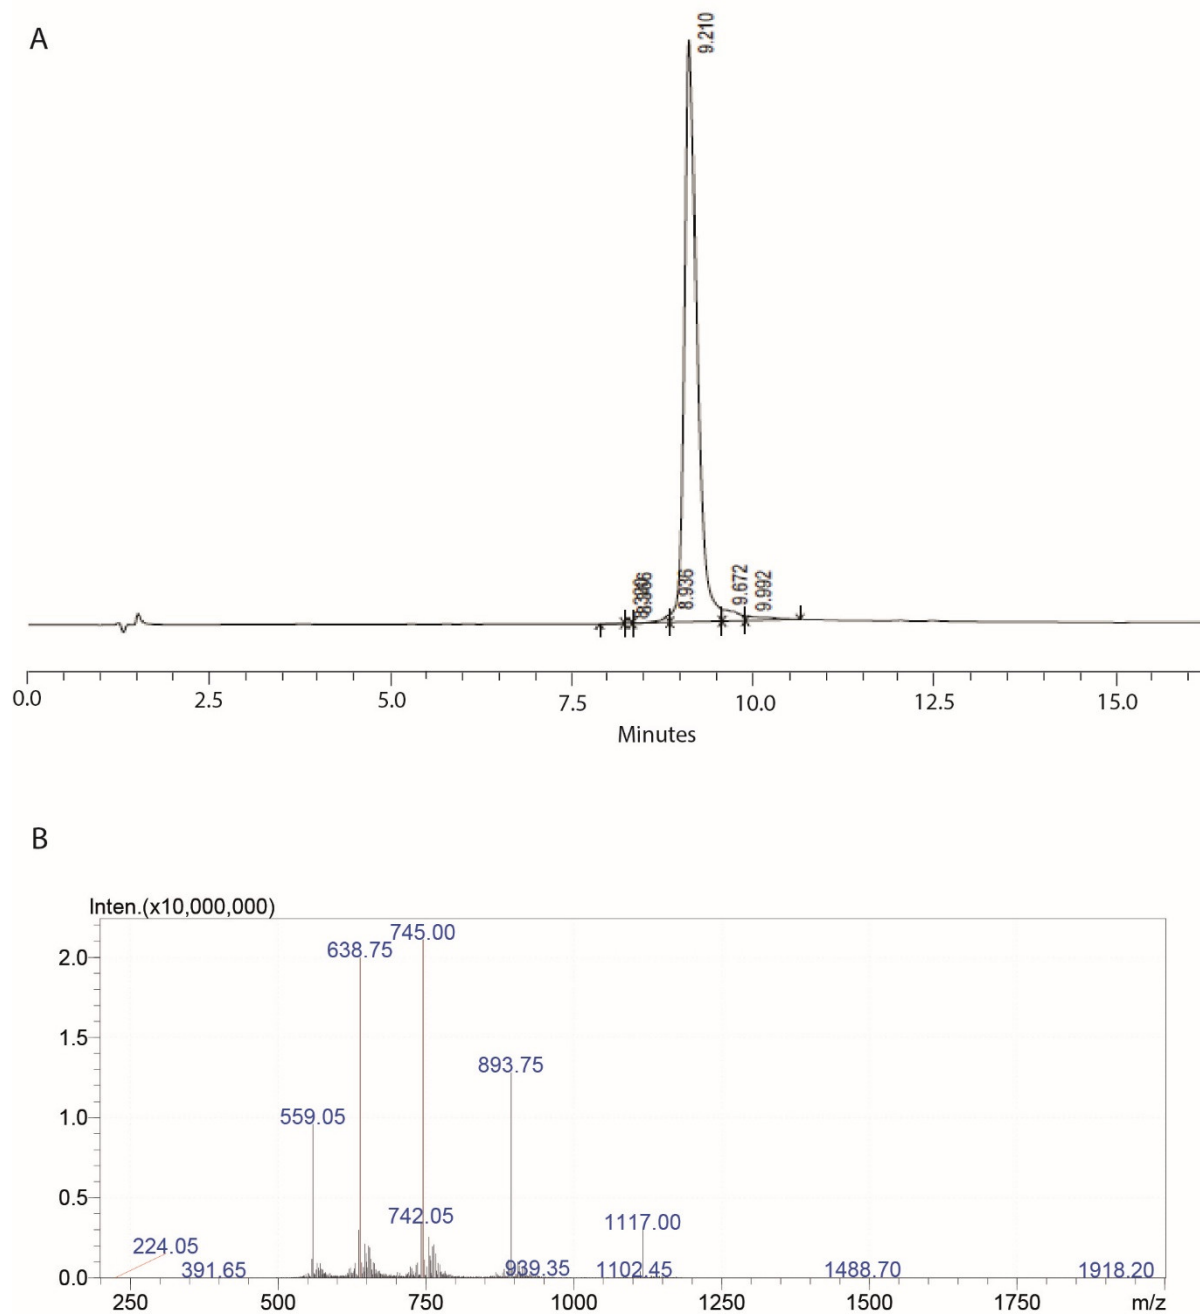

**Figure S5.** HPLC (A) and HPLC-MS (B) of 37TD-D352H. Gradient of 5 – 60 % acetonitrile in water in 15 min.

37TD-R342L: Ac-KKPLDGEYFTLQIRGRERFEMFLELNEALELKDAQAG-NH<sub>2</sub>

M <sup>13</sup>C-methyl methionine

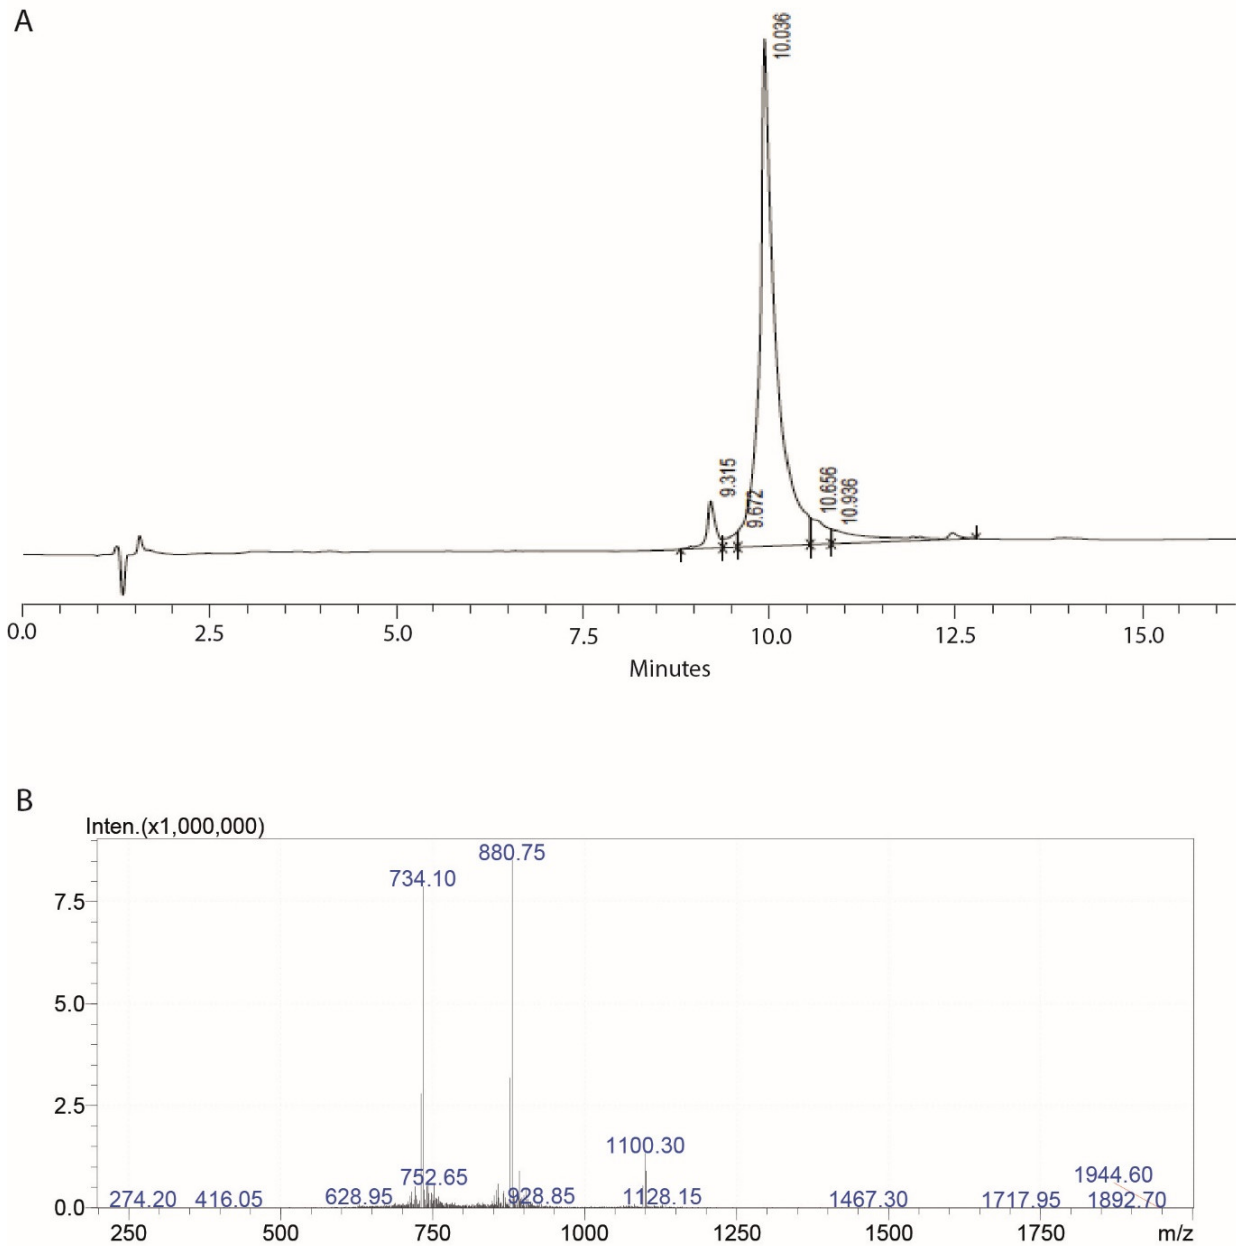

**Figure S6.** HPLC (A) and HPLC-MS (B) of 37TD-R342L. Gradient of 5 – 60 % acetonitrile in water in 15 min.



37TD-T329I: Ac-KKPLDGEYFILQIRGRERFEMFRELNEALELKDAQAG-NH<sub>2</sub>

M <sup>13</sup>C-methyl methionine

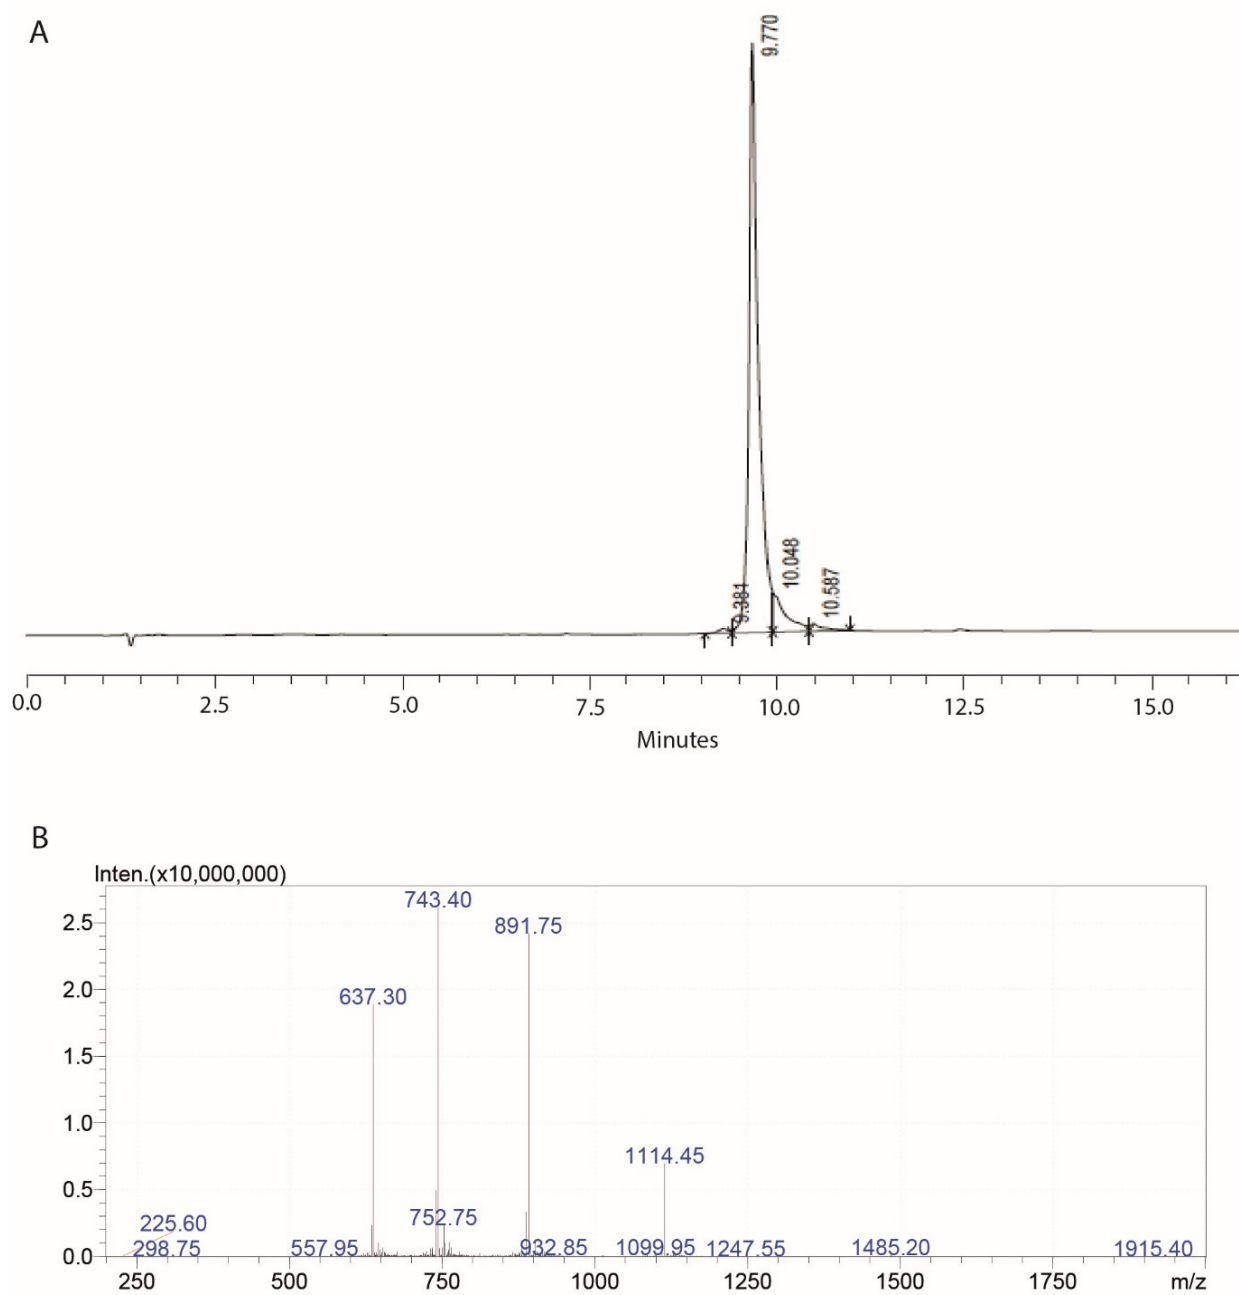

**Figure S7.** HPLC (A) and HPLC-MS (B) of 37TD-T329I. Gradient of 5 – 60 % acetonitrile in water in 15 min.

37TD-L344R: Ac-KKPLDGEYFTLQIRGRERFEMFRENEALELKDAQAG-NH<sub>2</sub>

M <sup>13</sup>C-methyl methionine

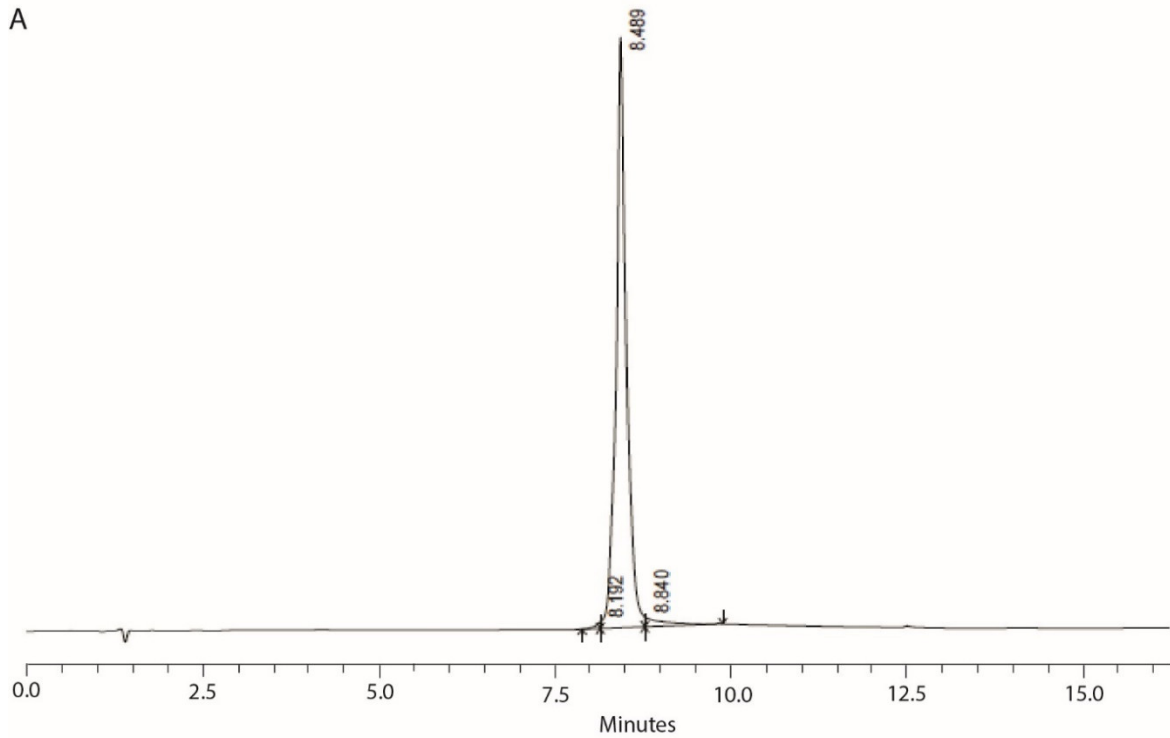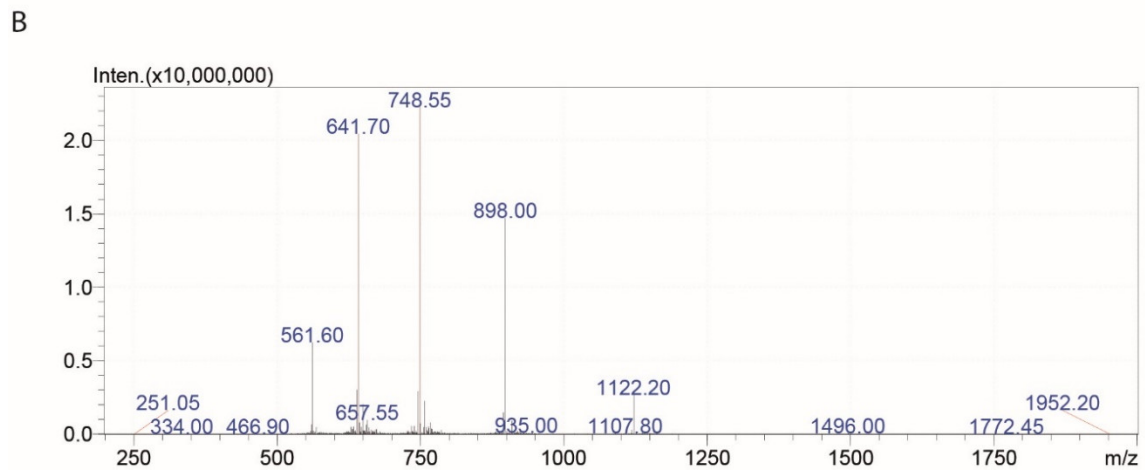

**Figure S8.** HPLC (A) and HPLC-MS (B) of 37TD-L344R. Gradient of 5 – 60 % acetonitrile in water in 15 min.

37TD-L344P: Ac-KKPLDGEYFTLQIRGRERFEMFRE<sup>P</sup>NEALELKDAQAG-NH<sub>2</sub>

M <sup>13</sup>C-methyl methionine

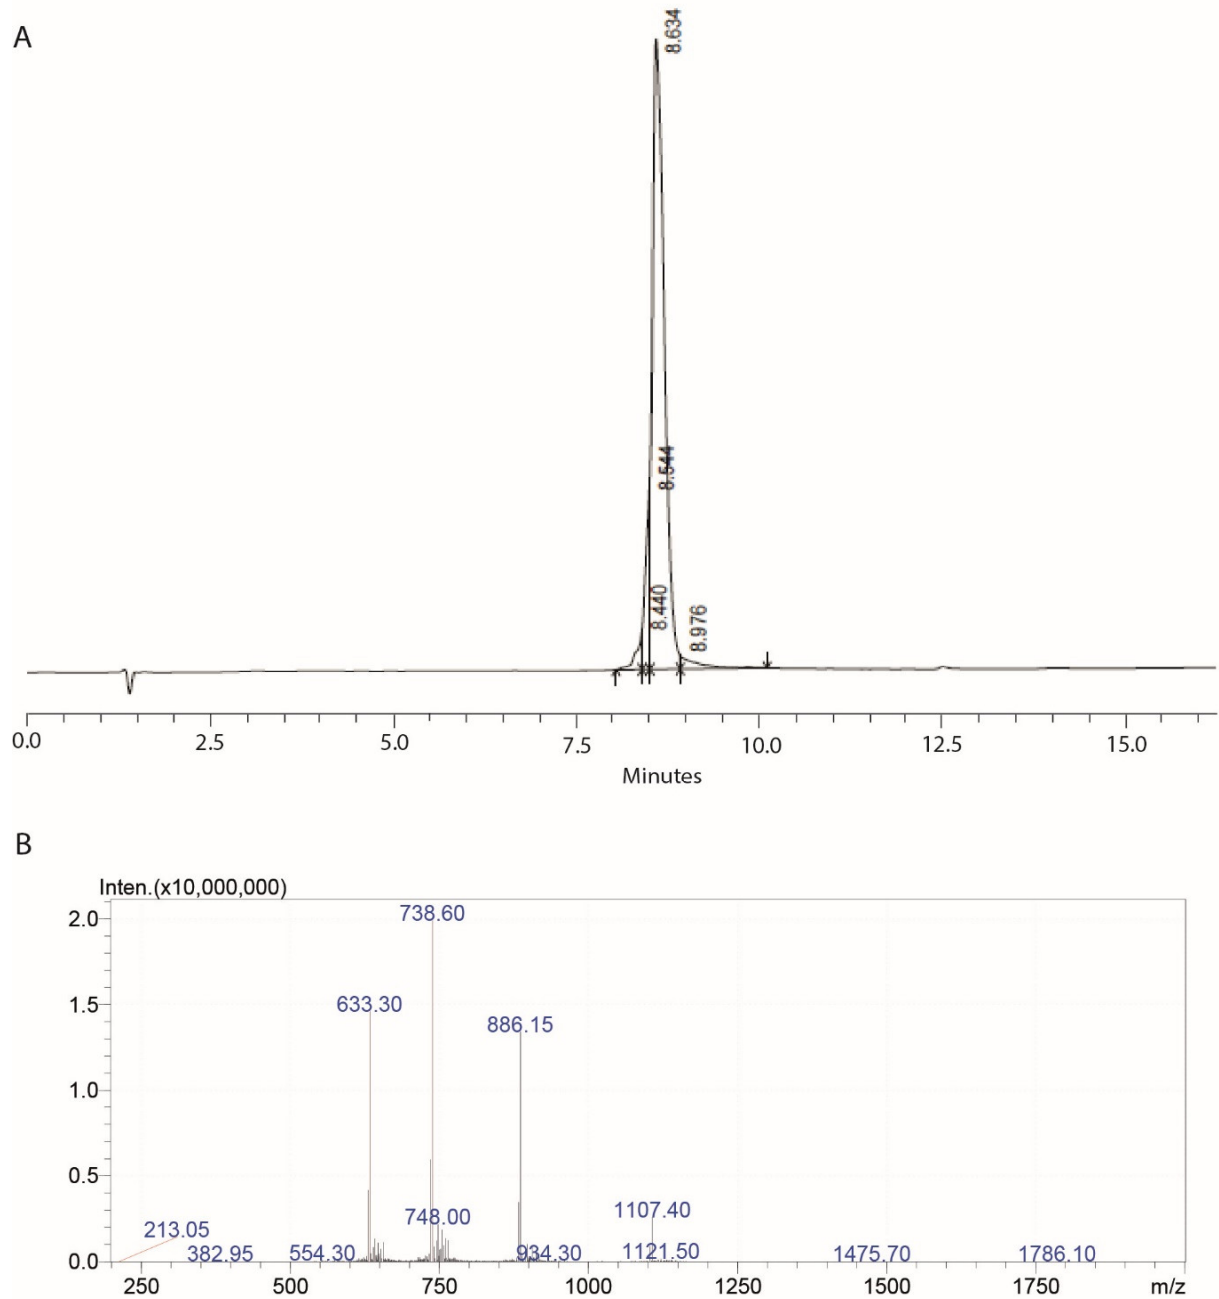

**Figure S9.** HPLC (A) and HPLC-MS (B) of 37TD-L344P. Gradient of 5 – 60 % acetonitrile in water in 15 min.

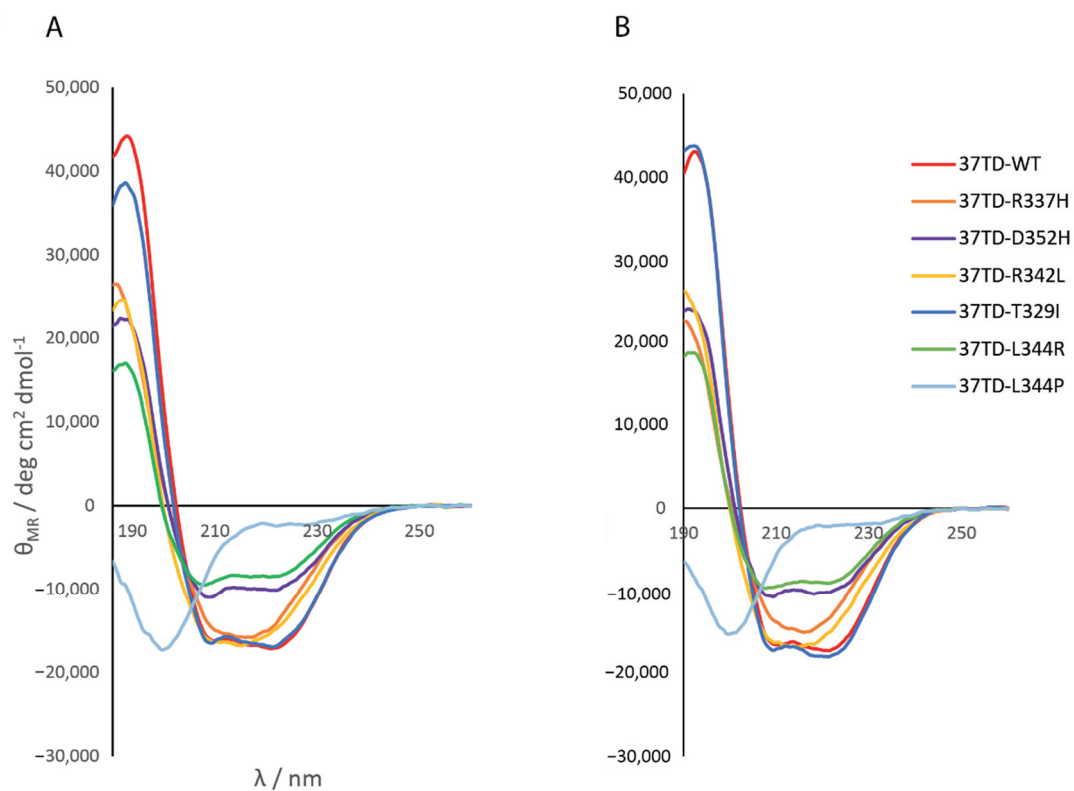

**Figure S10.** Circular dichroism spectra of the 37TDs in 50 mM sodium phosphate buffer, pH 7 (A) and water, pH 7 (B). The spectra correspond to a monomer concentration of 20  $\mu\text{M}$  of each peptide. For 37TD-WT and 37TD-R337H, non isotope-labelled peptides were used.

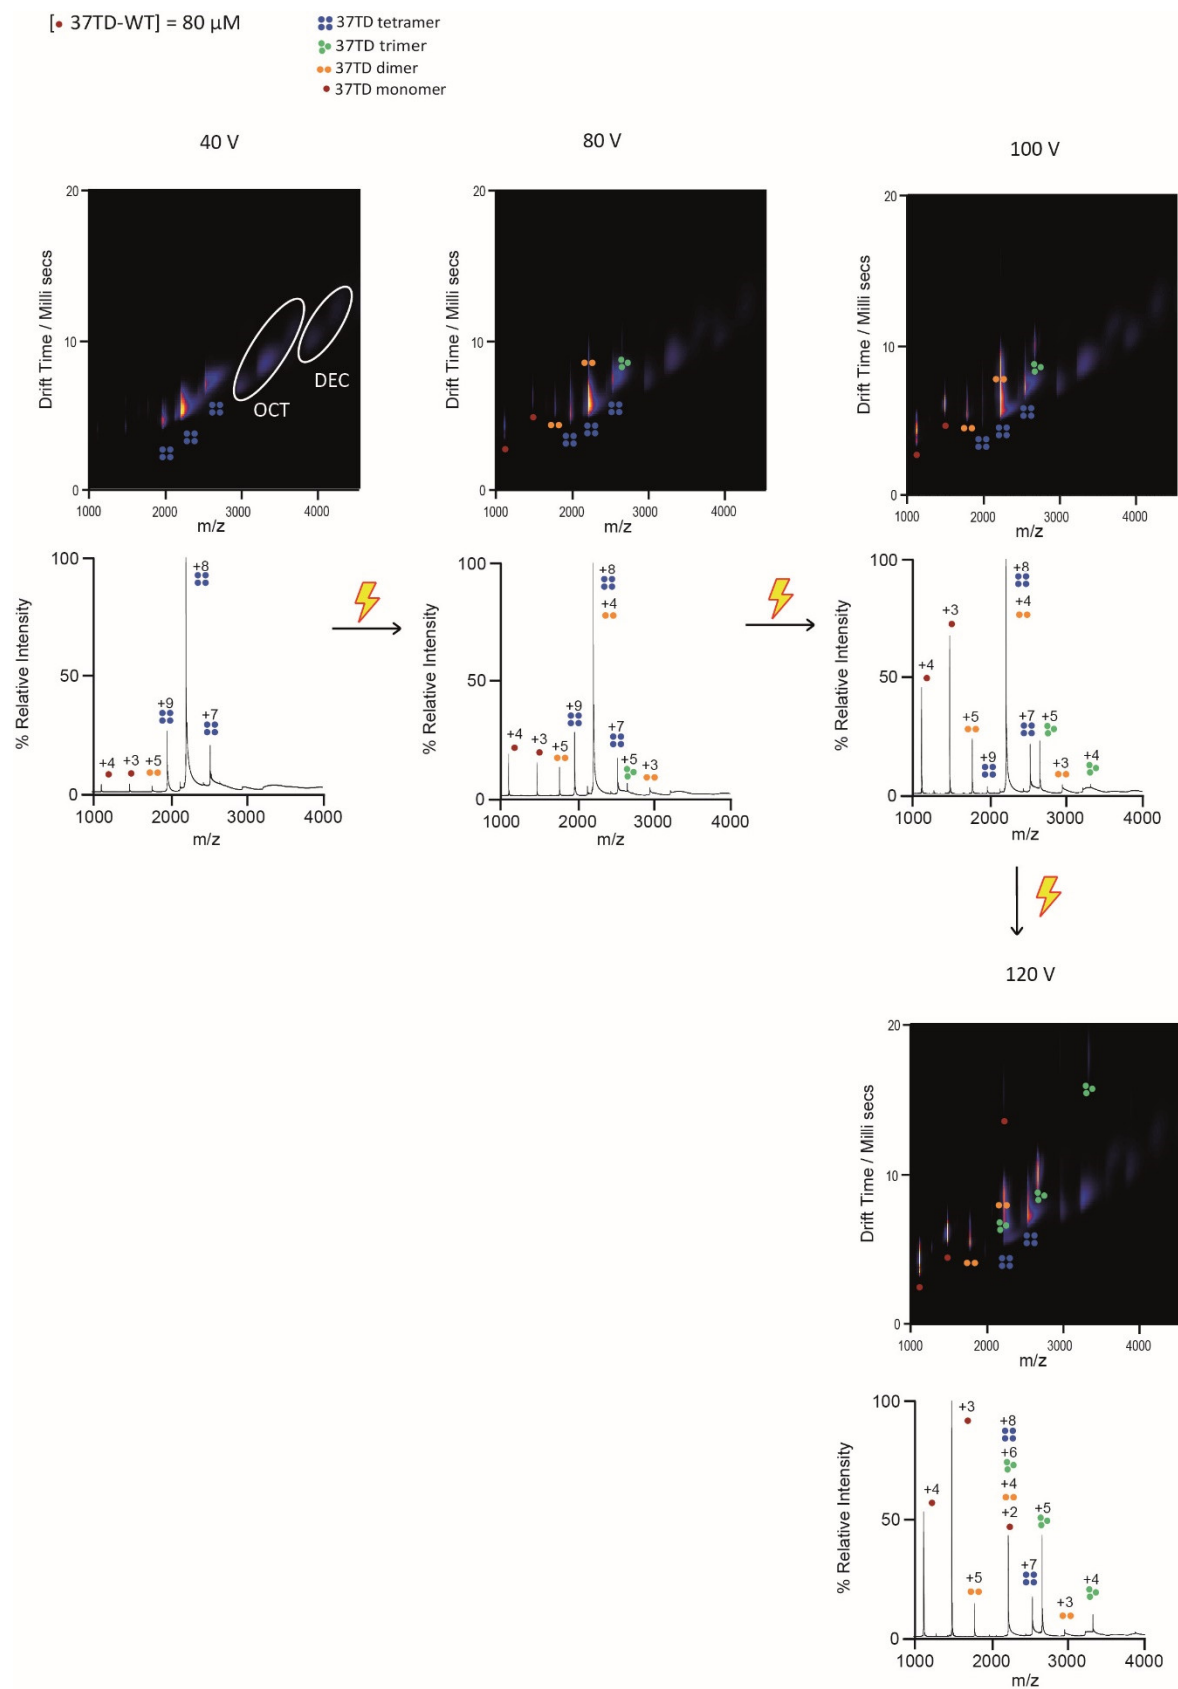

**Figure S11.** Native Mass Spectrometry and Ion Mobility spectra of 80  $\mu$ M 37TD-WT at different cone voltages (40, 80, 100, and 120 V). Non isotope-labelled peptide was used. The concentrations reported

always refer to the monomer. The sample was dissolved in 200 mM ammonium acetate buffer, pH 7.  
OCT: octamer; DEC: decahexamer (16 monomers).

[• 37TD-WT] = 20  $\mu$ M

••• 37TD tetramer  
••• 37TD trimer  
••• 37TD dimer  
• 37TD monomer

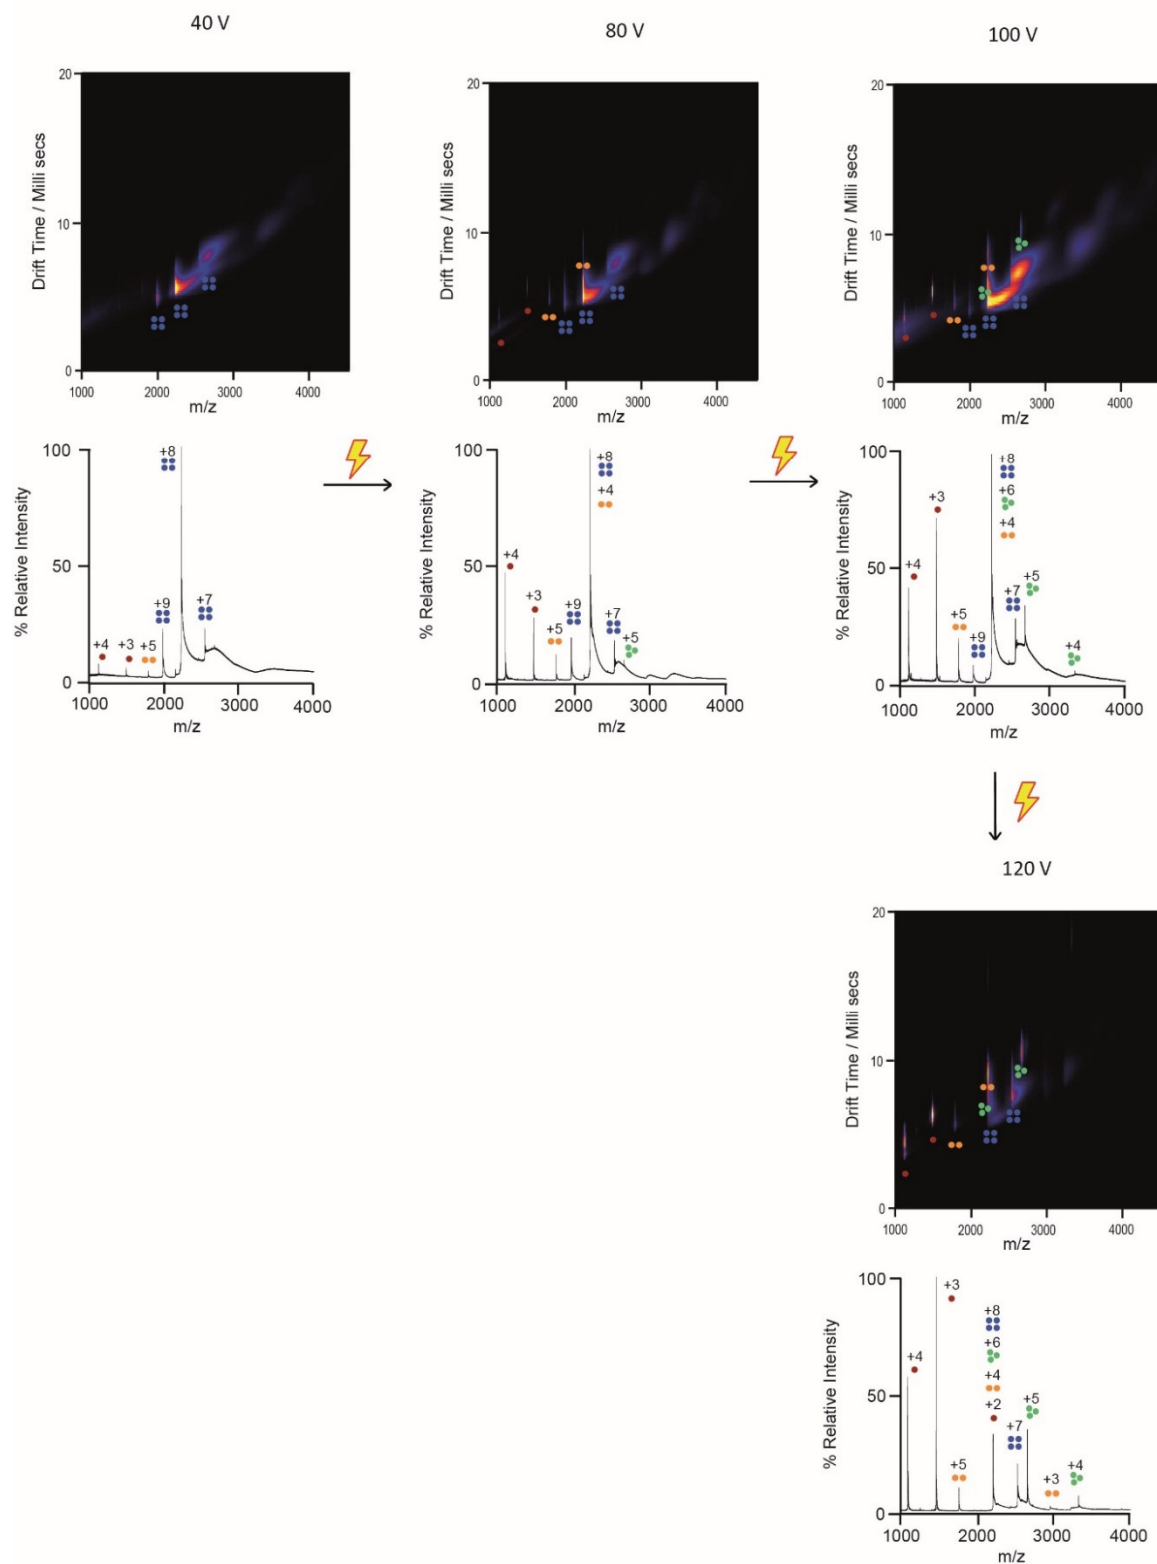

**Figure S12.** Native Mass Spectrometry and Ion Mobility spectra of 20  $\mu\text{M}$  37TD-WT at different cone voltages (40, 80, 100, and 120 V). Non isotope-labelled peptide was used. The concentrations reported always refer to the monomer. The sample was dissolved in 200 mM ammonium acetate buffer, pH 7.

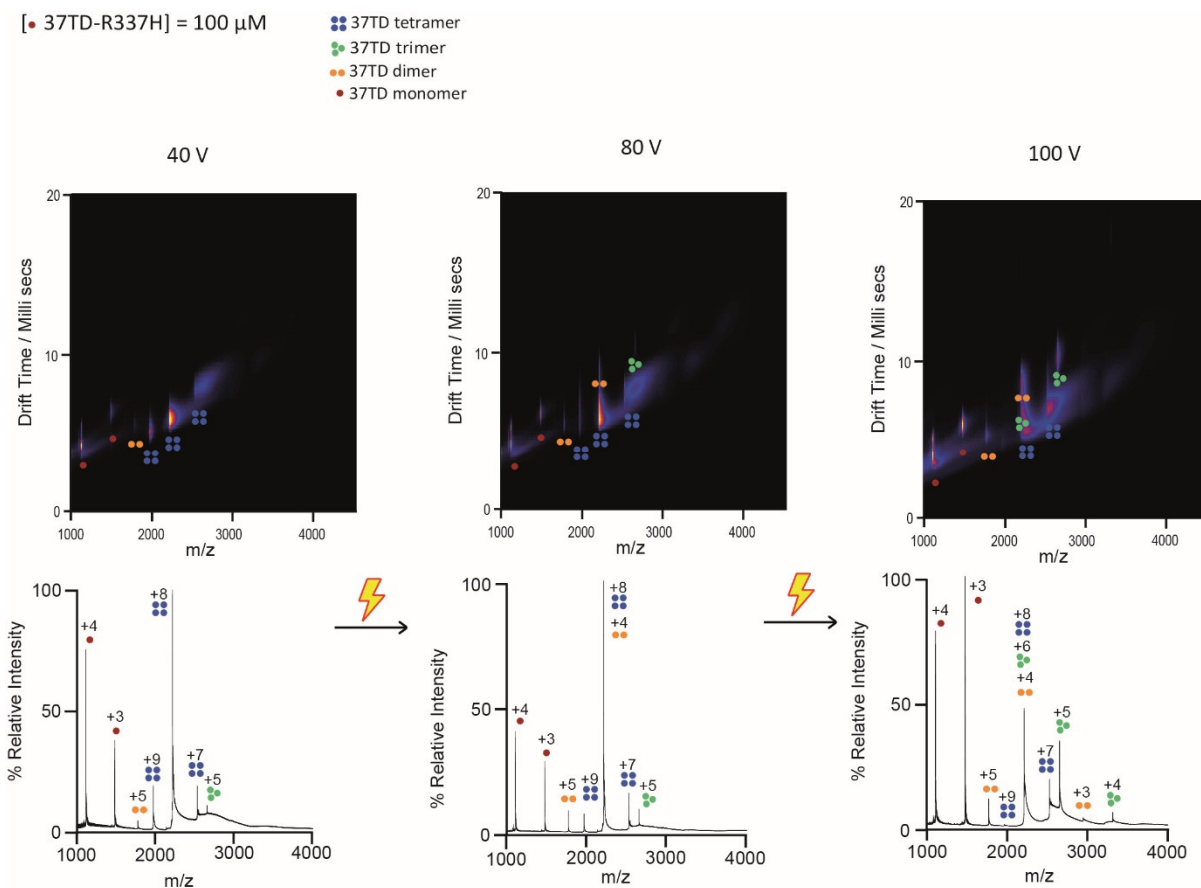

**Figure S13.** Native Mass Spectrometry and Ion Mobility spectra of 100  $\mu\text{M}$  37TD-R337H at different cone voltages (40, 80, and 100 V). Non isotope-labelled peptide was used. The concentrations reported refer to the monomer. The sample was dissolved in 200 mM ammonium acetate buffer, pH 7.

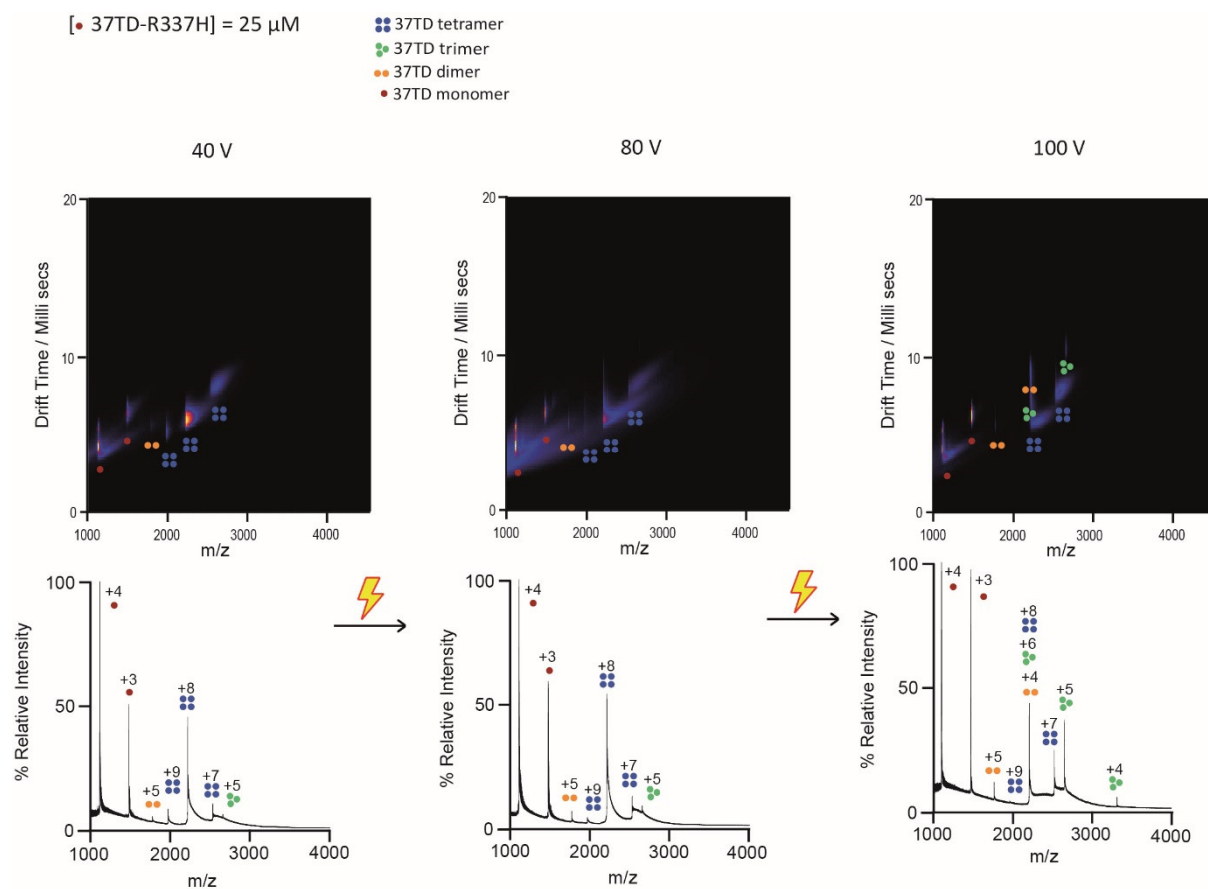

**Figure S14.** Native Mass Spectrometry and Ion Mobility spectra of 25  $\mu$ M 37TD-R337H at different cone voltages (40, 80, and 100 V). Non isotope-labelled peptide was used. The concentrations reported refer to the monomer. The sample was dissolved in 200 mM ammonium acetate buffer, pH 7.



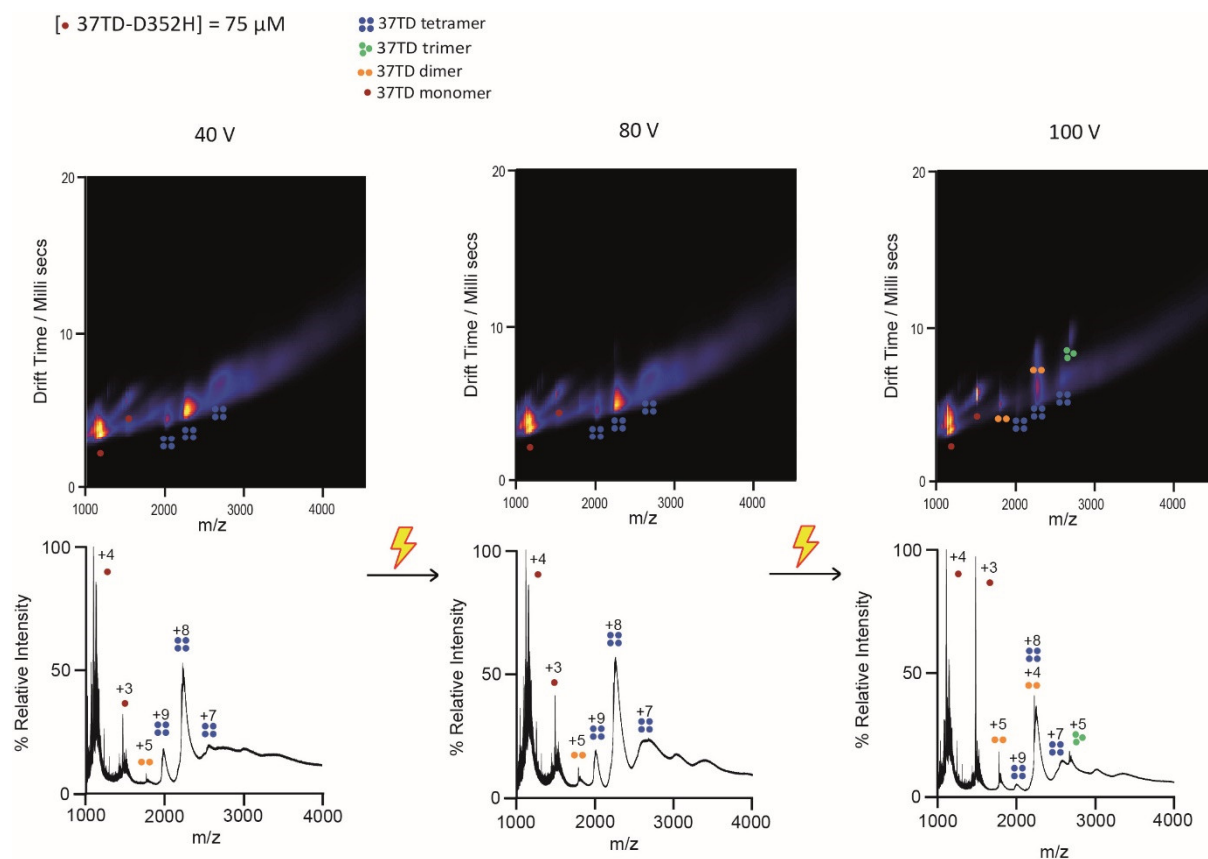

**Figure S15.** Native Mass Spectrometry and Ion Mobility spectra of 75  $\mu$ M 37TD-D352H at different cone voltages (40, 80, and 100 V). The concentrations reported refer to the monomer. The sample was dissolved in 200 mM ammonium acetate buffer, pH 7.

[• 37TD-D352H] = 20  $\mu$ M

■ 37TD tetramer  
 ■ 37TD trimer  
 ■ 37TD dimer  
 ■ 37TD monomer

40 V

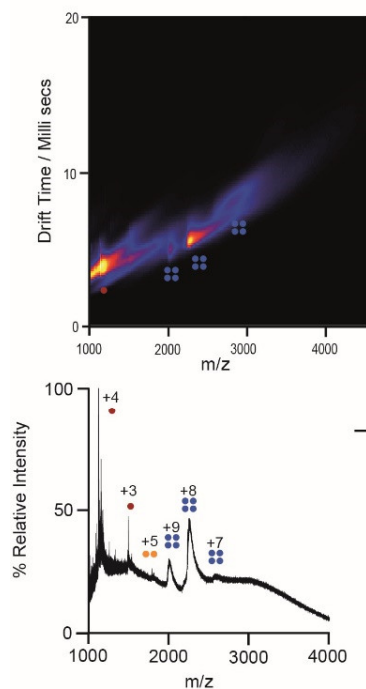

80 V

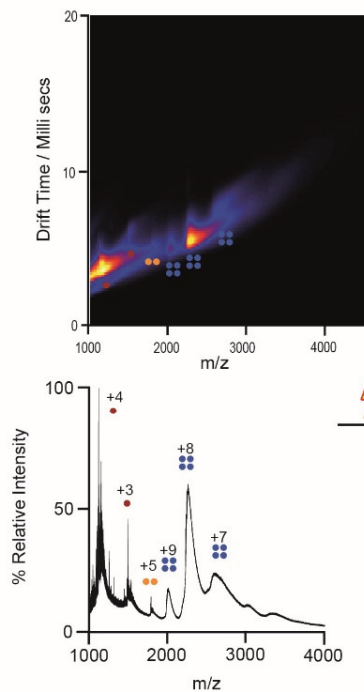

100 V

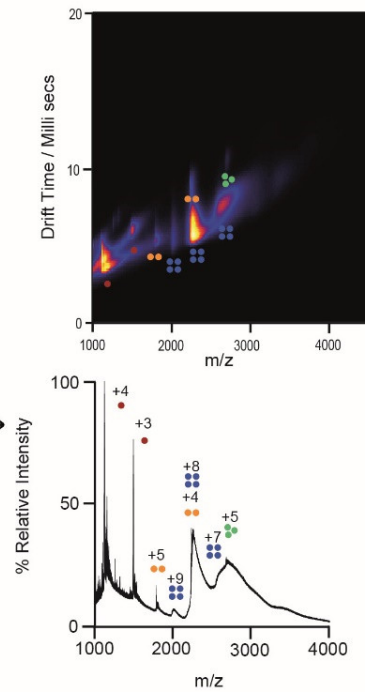

120 V

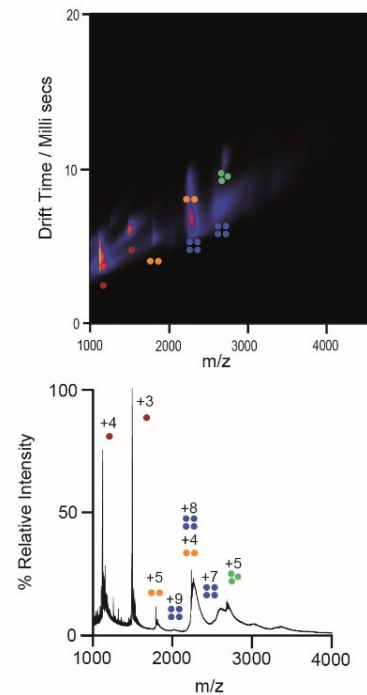

**Figure S16.** Native Mass Spectrometry and Ion Mobility spectra of 20  $\mu\text{M}$  37TD-D352H at different cone voltages (40, 80, and 100 V). The concentrations reported refer to the monomer. The sample was dissolved in 200 mM ammonium acetate buffer, pH 7.

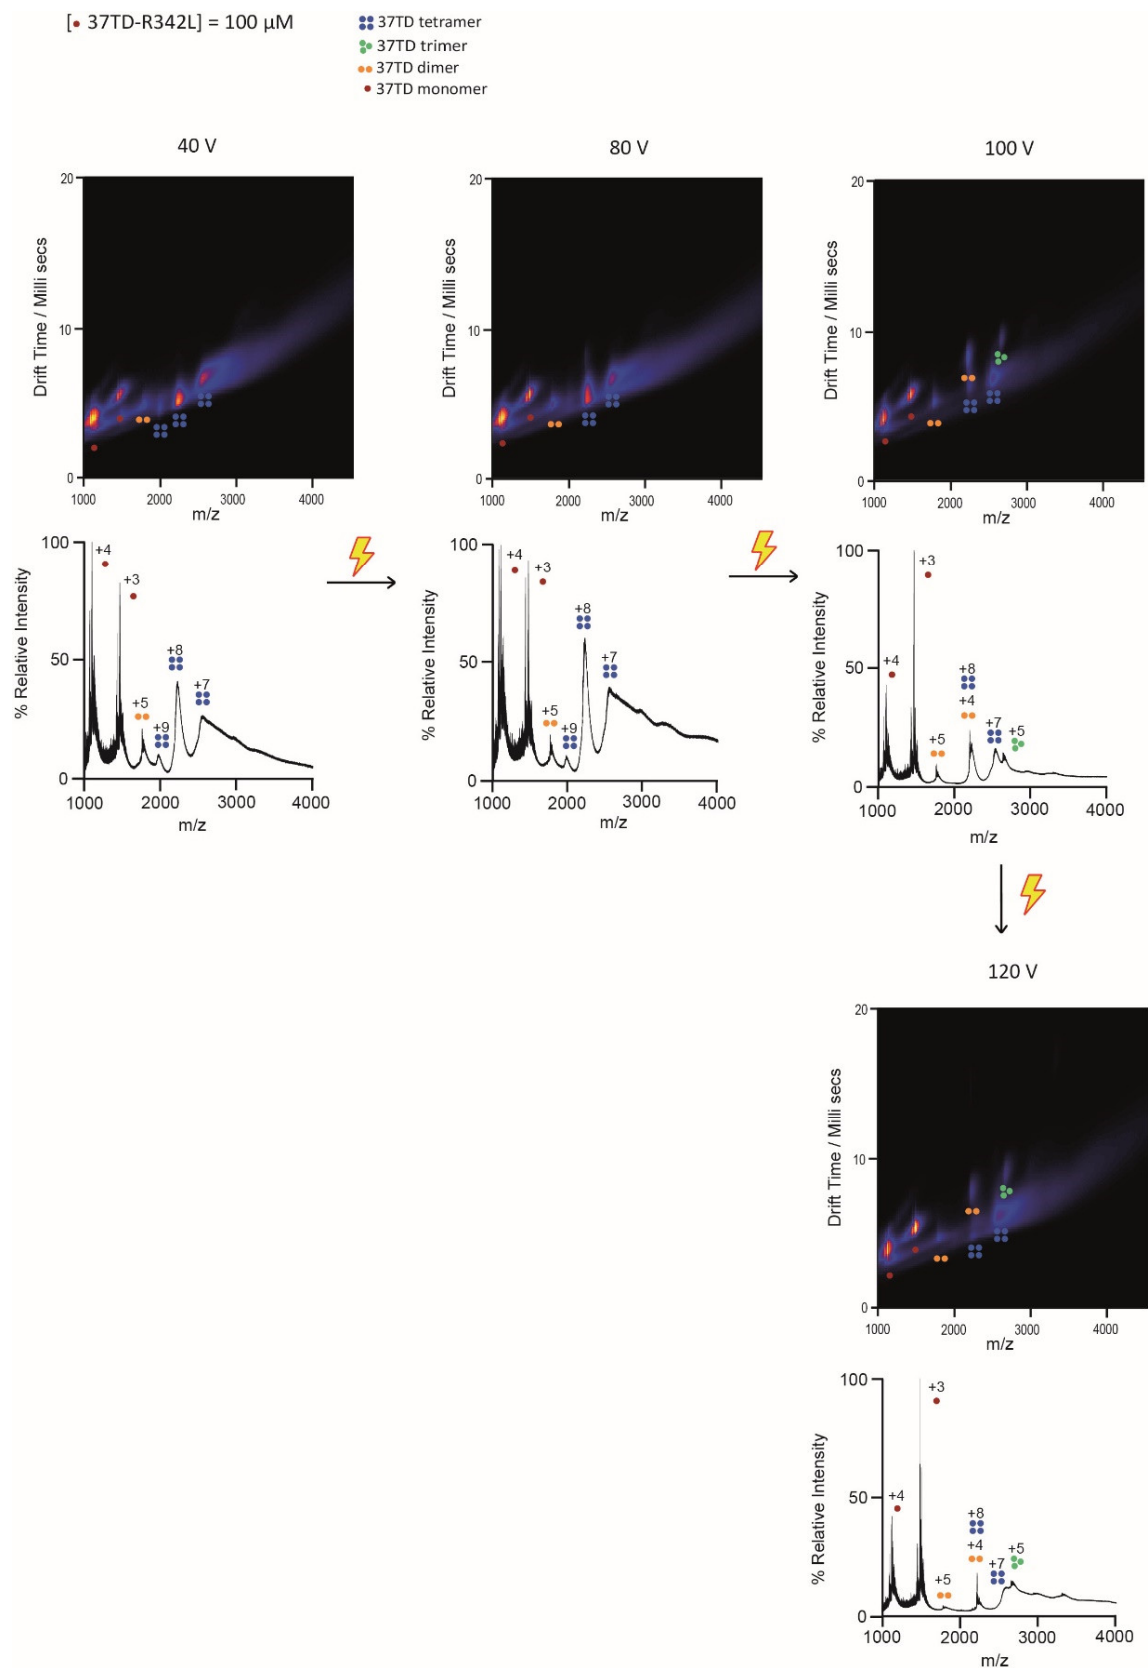

**Figure S17.** Native Mass Spectrometry and Ion Mobility spectra of 100  $\mu\text{M}$  37TD-R342L at different cone voltages (40, 80, 100, and 120 V). The concentrations reported refer to the monomer. The sample was dissolved in 200 mM ammonium acetate buffer, pH 7.

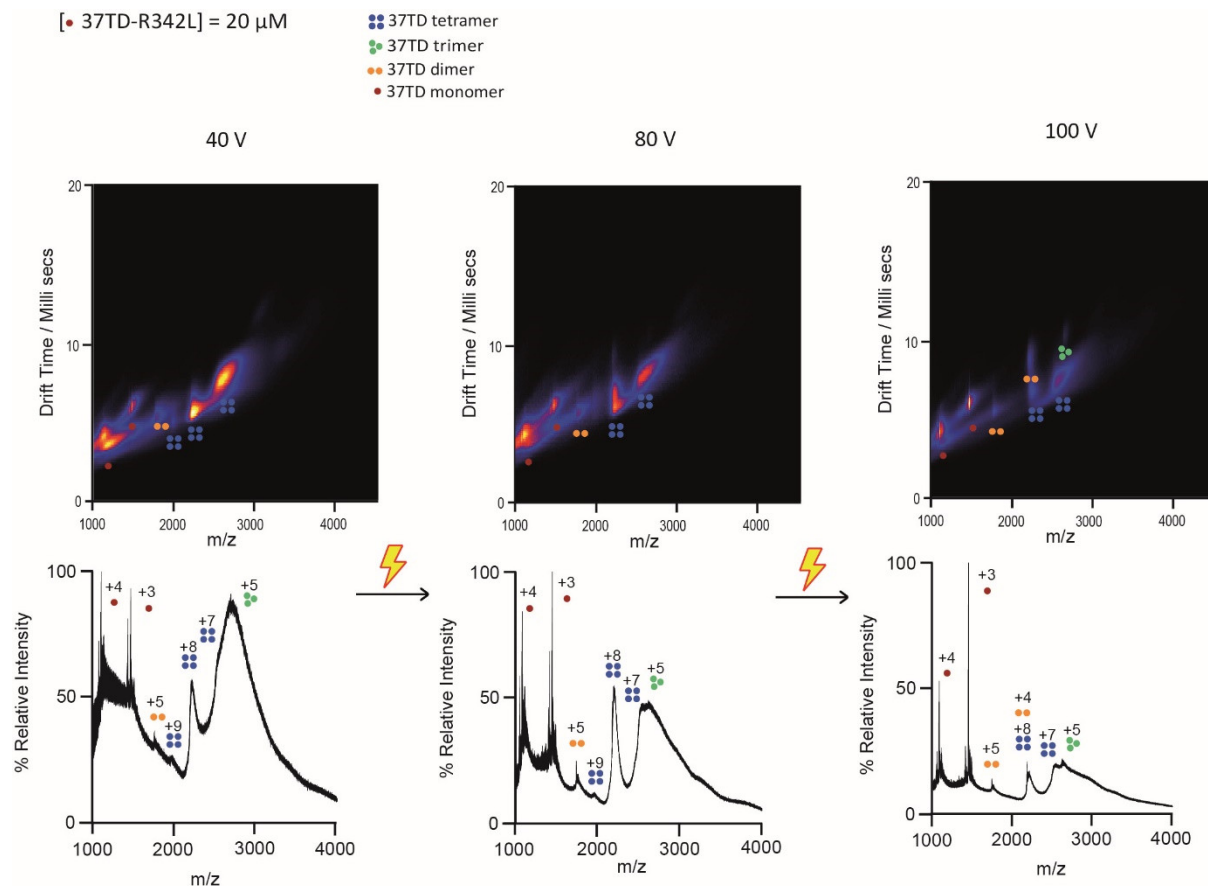

**Figure S18.** Native Mass Spectrometry and Ion Mobility spectra of 20  $\mu\text{M}$  37TD-R342L at different cone voltages (40, 80, 100, and 120 V). The concentrations reported refer to the monomer. The sample was dissolved in 200 mM ammonium acetate buffer, pH 7.

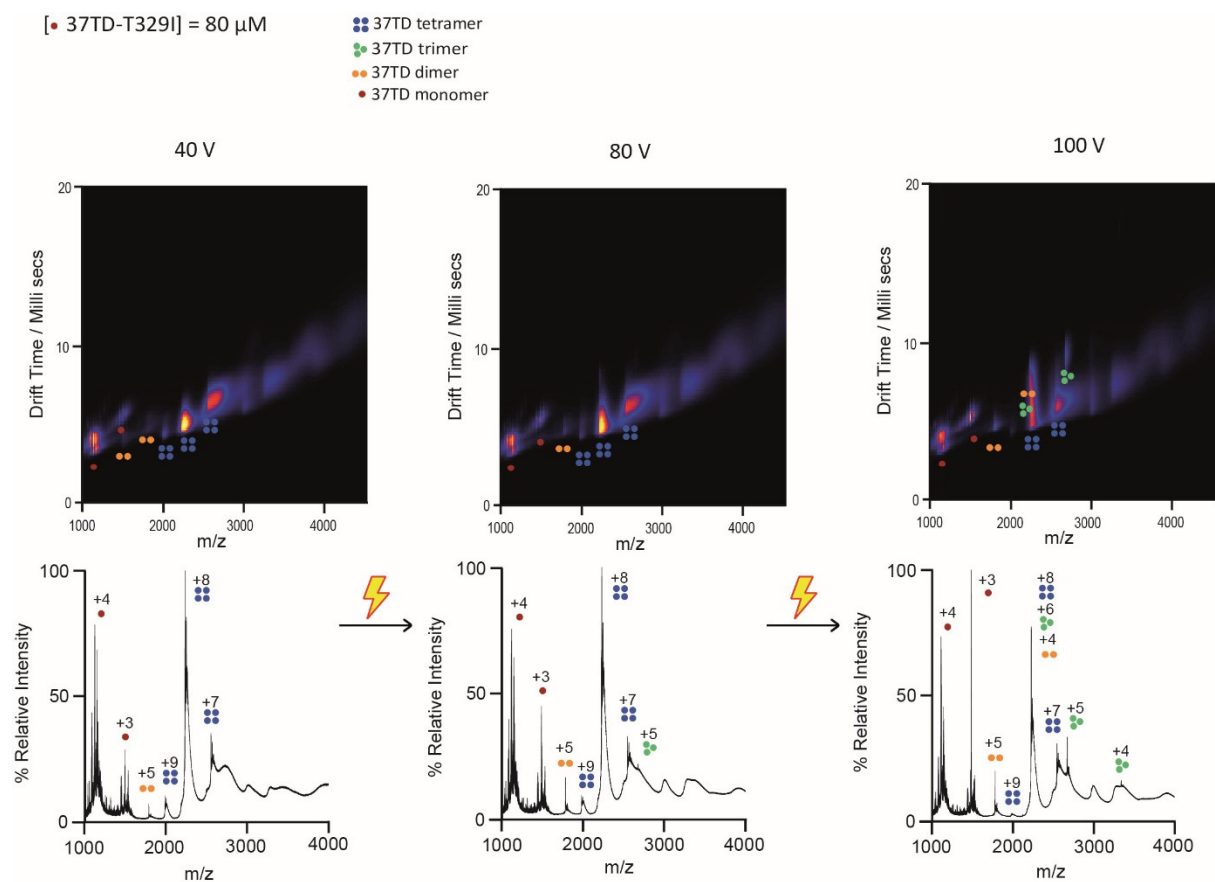

**Figure S19.** Native Mass Spectrometry and Ion Mobility spectra of 80  $\mu$ M 37TD-T329I at different cone voltages (40, 80, and 100 V). The concentrations reported refer to the monomer. The sample was dissolved in 200 mM ammonium acetate buffer, pH 7.

[• 37TD-T329I] = 20  $\mu$ M

••• 37TD tetramer  
••• 37TD trimer  
••• 37TD dimer  
• 37TD monomer

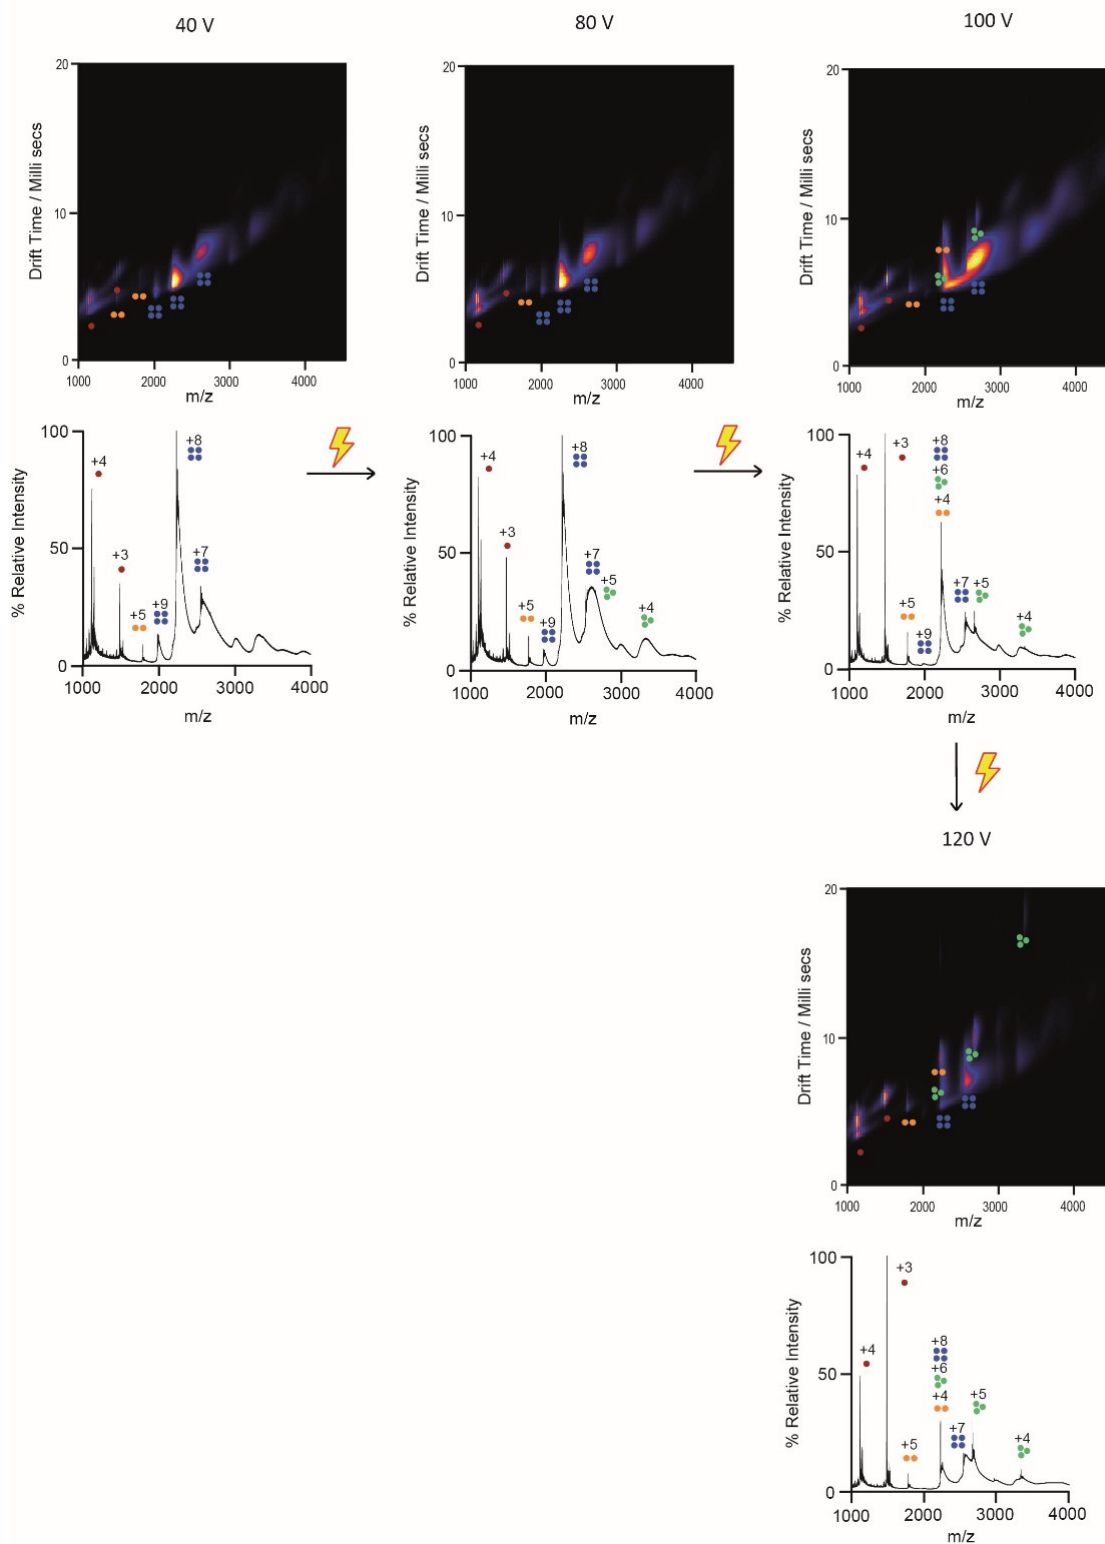

**Figure S20.** Native Mass Spectrometry and Ion Mobility spectra of 20  $\mu\text{M}$  37TD-T329I at different cone voltages (40, 80, and 100 V). The concentrations reported refer to the monomer. The sample was dissolved in 200 mM ammonium acetate buffer, pH 7.

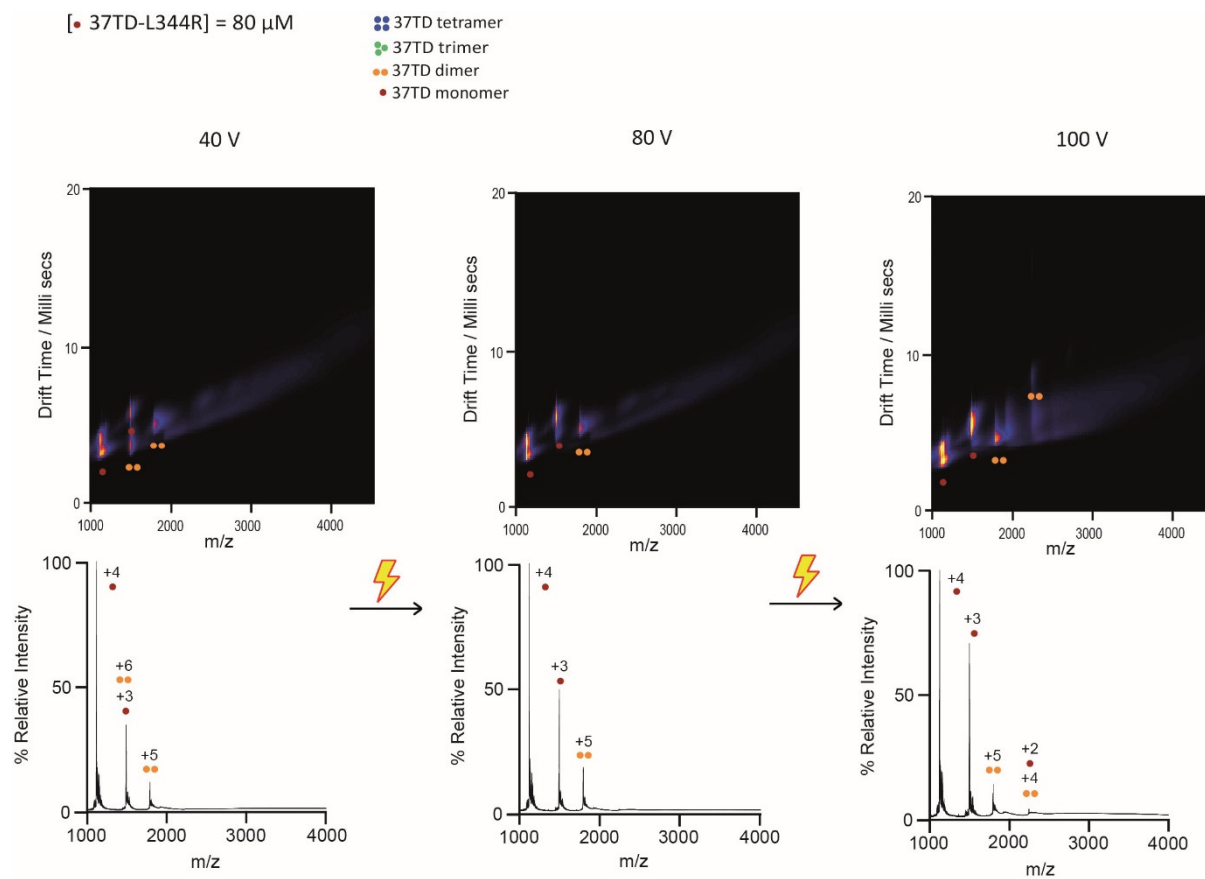

**Figure S21.** Native Mass Spectrometry and Ion Mobility spectra of 80  $\mu\text{M}$  37TD-L344R at different cone voltages (40, 80, and 100 V). The concentrations reported refer to the monomer. The sample was dissolved in 200 mM ammonium acetate buffer, pH 7.





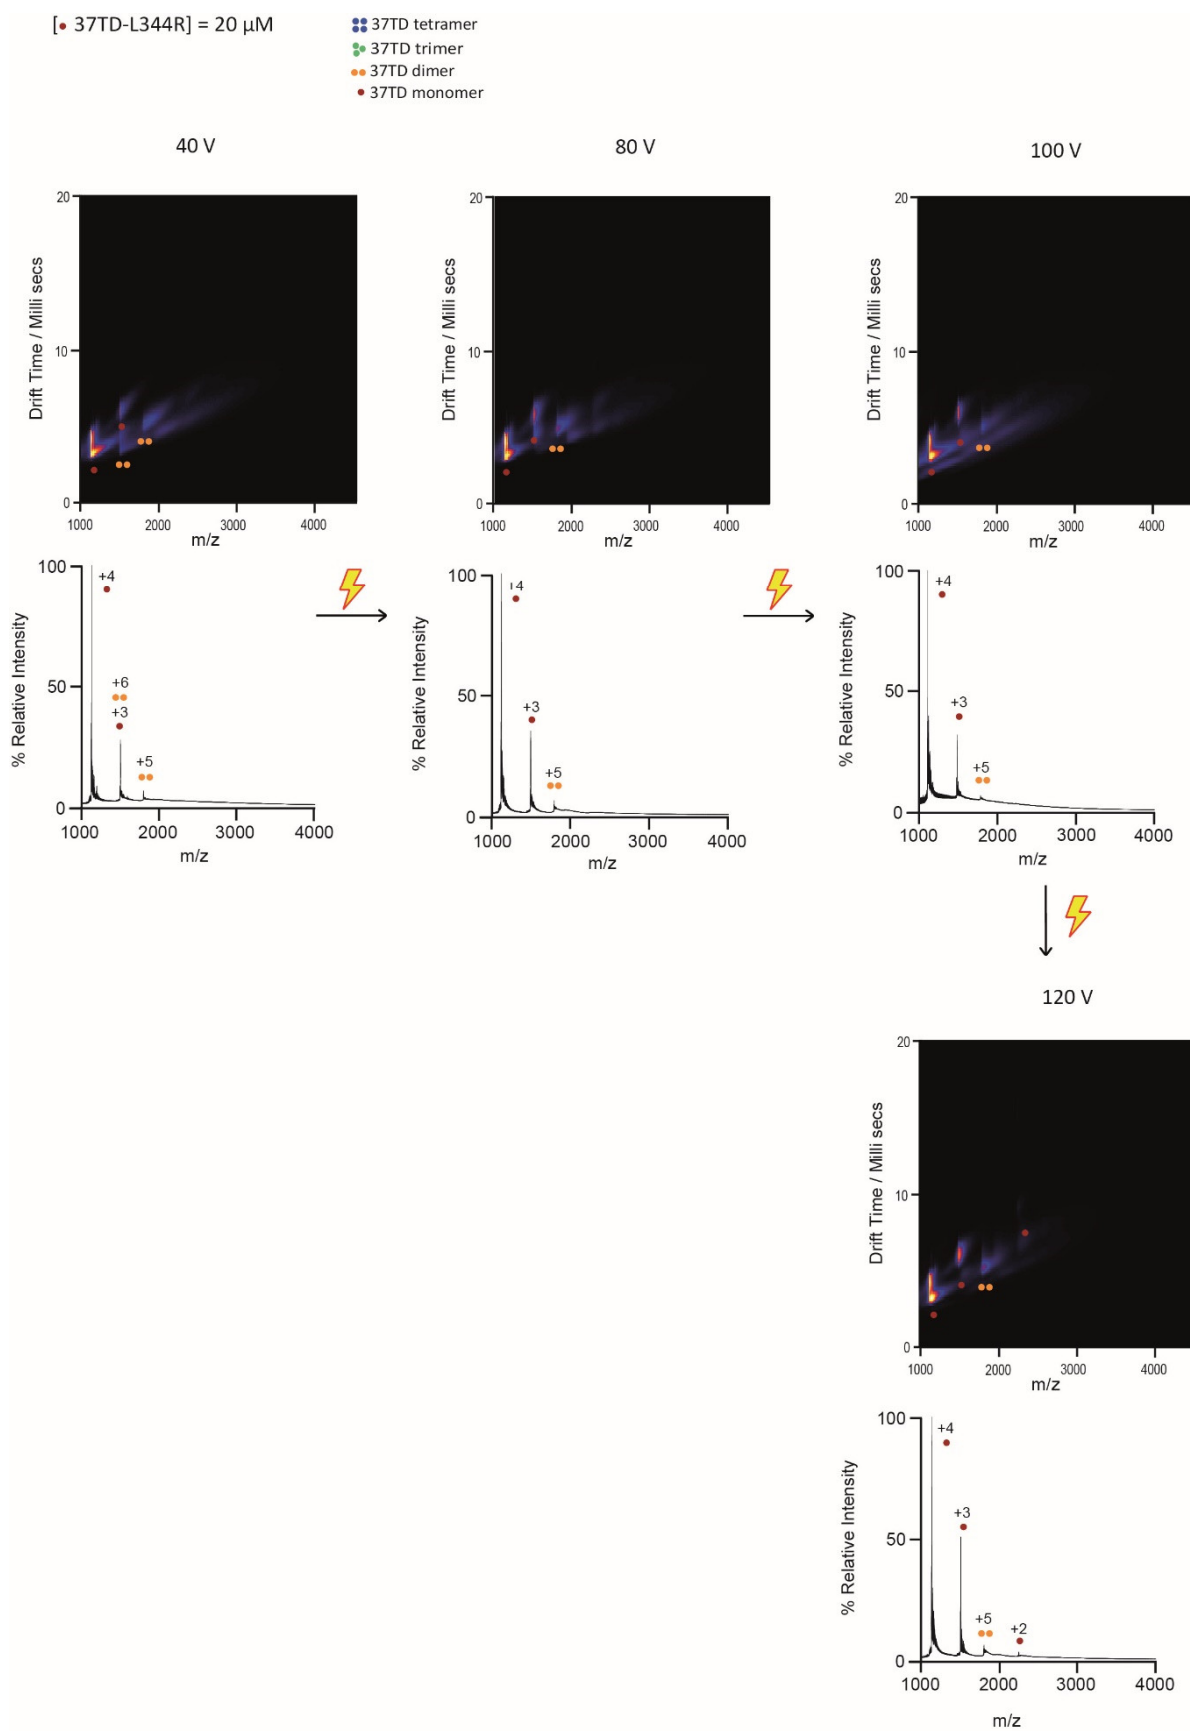

**Figure S22.** Native Mass Spectrometry and Ion Mobility spectra of 80  $\mu$ M 37TD-L344R at different cone voltages (40, 80, and 100 V). The concentrations reported refer to the monomer. The sample was dissolved in 200 mM ammonium acetate buffer, pH 7.

- 37TD tetramer
- 37TD trimer
- 37TD dimer
- 37TD monomer

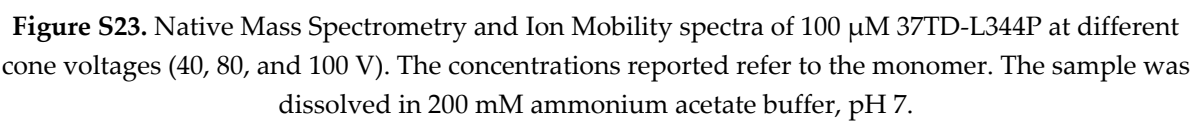

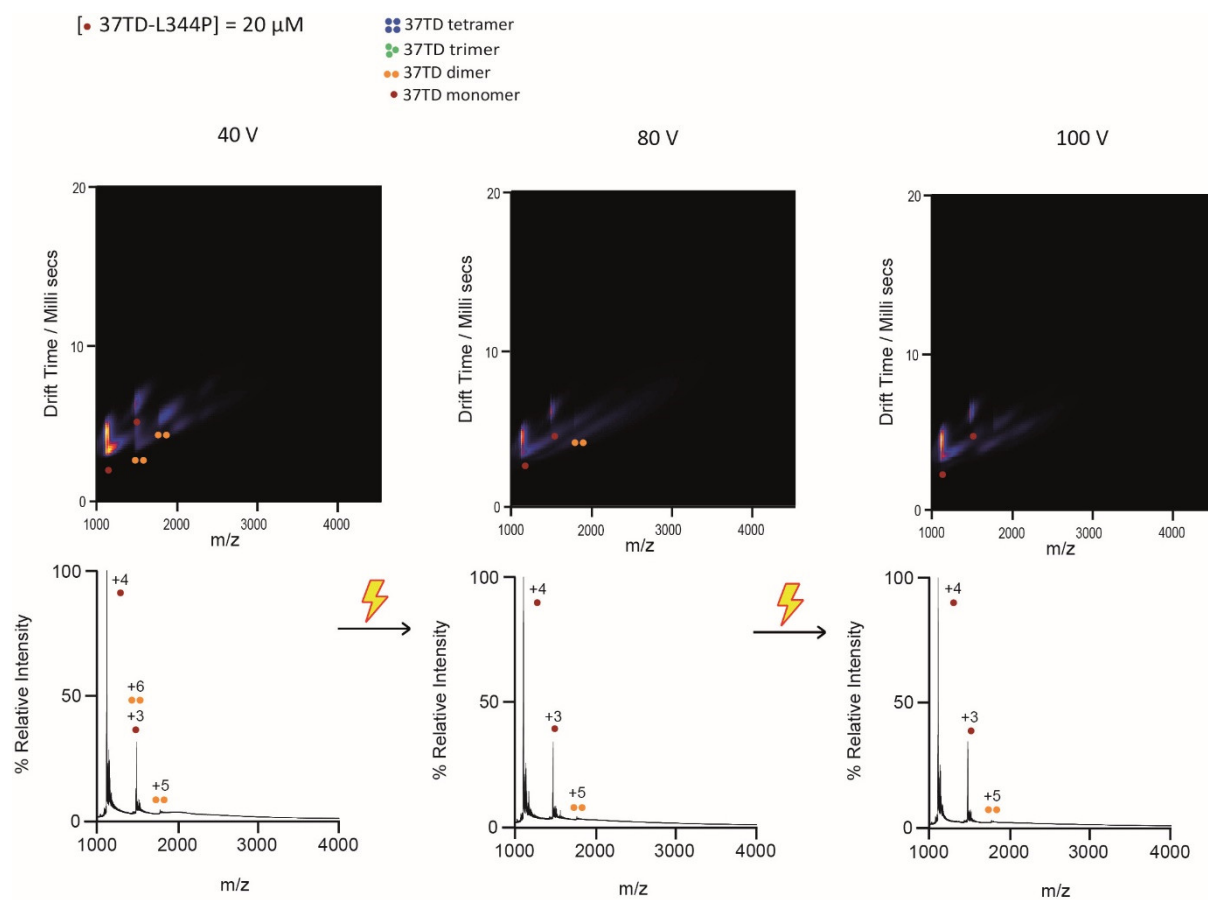

**Figure S24.** Native Mass Spectrometry and Ion Mobility spectra of 20  $\mu$ M 37TD-L344P at different cone voltages (40, 80, and 100 V). The concentrations reported refer to the monomer. The sample was dissolved in 200 mM ammonium acetate buffer, pH 7.

37TD-WT  
MW 4441,02

|        |    | Monomer | Dimer   | Trimer   | Tetramer | Octamer  | Decahexamer |
|--------|----|---------|---------|----------|----------|----------|-------------|
| Charge | 1  | 4442,02 | 8883,04 | 13324,06 | 17765,08 | 35529,16 | 71057,32    |
|        | 2  | 2221,51 | 4442,02 | 6662,53  | 8883,04  | 17765,08 | 35529,16    |
|        | 3  | 1481,34 | 2961,68 | 4442,02  | 5922,36  | 11843,72 | 23686,44    |
|        | 4  | 1111,26 | 2221,51 | 3331,77  | 4442,02  | 8883,04  | 17765,08    |
|        | 5  | 889,20  | 1777,41 | 2665,61  | 3553,82  | 7106,63  | 14212,26    |
|        | 6  | 741,17  | 1481,34 | 2221,51  | 2961,68  | 5922,36  | 11843,72    |
|        | 7  | 635,43  | 1269,86 | 1904,29  | 2538,73  | 5076,45  | 10151,90    |
|        | 8  | 556,13  | 1111,26 | 1666,38  | 2221,51  | 4442,02  | 8883,04     |
|        | 9  | 494,45  | 987,89  | 1481,34  | 1974,79  | 3948,57  | 7896,15     |
|        | 10 | 445,10  | 889,20  | 1333,31  | 1777,41  | 3553,82  | 7106,63     |

37TD-R337H  
MW 4421,98

|        |    | Monomer | Dimer   | Trimer   | Tetramer |
|--------|----|---------|---------|----------|----------|
| Charge | 1  | 4422,98 | 8844,96 | 13266,94 | 17688,92 |
|        | 2  | 2211,99 | 4422,98 | 6633,97  | 8844,96  |
|        | 3  | 1474,99 | 2948,99 | 4422,98  | 5896,97  |
|        | 4  | 1106,50 | 2211,99 | 3317,49  | 4422,98  |
|        | 5  | 885,40  | 1769,79 | 2654,19  | 3538,58  |
|        | 6  | 738,00  | 1474,99 | 2211,99  | 2948,99  |
|        | 7  | 632,71  | 1264,42 | 1896,13  | 2527,85  |
|        | 8  | 553,75  | 1106,50 | 1659,24  | 2211,99  |
|        | 9  | 492,33  | 983,66  | 1474,99  | 1966,32  |
|        | 10 | 443,20  | 885,40  | 1327,59  | 1769,79  |

37TD-T329I  
MW 4454,077

|        |    | Monomer | Dimer   | Trimer   | Tetramer |
|--------|----|---------|---------|----------|----------|
| Charge | 1  | 4455,08 | 8909,15 | 13363,23 | 17817,31 |
|        | 2  | 2228,04 | 4455,08 | 6682,12  | 8909,15  |
|        | 3  | 1485,69 | 2970,38 | 4455,08  | 5939,77  |
|        | 4  | 1114,52 | 2228,04 | 3341,56  | 4455,08  |
|        | 5  | 891,82  | 1782,63 | 2673,45  | 3564,26  |
|        | 6  | 743,35  | 1485,69 | 2228,04  | 2970,38  |
|        | 7  | 637,30  | 1273,59 | 1909,89  | 2546,19  |
|        | 8  | 557,76  | 1114,52 | 1671,28  | 2228,04  |
|        | 9  | 495,90  | 990,79  | 1485,69  | 1980,59  |
|        | 10 | 446,41  | 891,82  | 1337,22  | 1782,63  |

37TD-D352H  
MW 4464,08

|        |    | Monomer | Dimer   | Trimer   | Tetramer |
|--------|----|---------|---------|----------|----------|
| Charge | 1  | 4465,08 | 8929,15 | 13393,23 | 17857,30 |
|        | 2  | 2233,04 | 4465,08 | 6697,11  | 8929,15  |
|        | 3  | 1489,03 | 2977,05 | 4465,08  | 5953,10  |
|        | 4  | 1117,02 | 2233,04 | 3349,06  | 4465,08  |
|        | 5  | 893,82  | 1786,63 | 2679,45  | 3572,26  |
|        | 6  | 745,01  | 1489,03 | 2233,04  | 2977,05  |
|        | 7  | 638,73  | 1276,45 | 1914,18  | 2551,90  |
|        | 8  | 559,01  | 1117,02 | 1675,03  | 2233,04  |
|        | 9  | 497,01  | 993,02  | 1489,03  | 1985,03  |
|        | 10 | 447,41  | 893,82  | 1340,22  | 1786,63  |

37TD-L344R  
MW 4485,051

|        |    | Monomer | Dimer   | Trimer   | Tetramer |
|--------|----|---------|---------|----------|----------|
| Charge | 1  | 4486,05 | 8971,10 | 13456,15 | 17941,20 |
|        | 2  | 2243,53 | 4486,05 | 6728,58  | 8971,10  |
|        | 3  | 1496,02 | 2991,03 | 4486,05  | 5981,07  |
|        | 4  | 1122,26 | 2243,53 | 3364,79  | 4486,05  |
|        | 5  | 898,01  | 1795,02 | 2692,03  | 3589,04  |
|        | 6  | 748,51  | 1496,02 | 2243,53  | 2991,03  |
|        | 7  | 641,72  | 1282,44 | 1923,16  | 2563,89  |
|        | 8  | 561,63  | 1122,26 | 1682,89  | 2243,53  |
|        | 9  | 499,34  | 997,68  | 1496,02  | 1994,36  |
|        | 10 | 449,51  | 898,01  | 1346,52  | 1795,02  |

37TD-R342L  
MW 4399,00

|        |    | Monomer | Dimer   | Trimer   | Tetramer |
|--------|----|---------|---------|----------|----------|
| Charge | 1  | 4400,00 | 8798,99 | 13197,99 | 17596,98 |
|        | 2  | 2200,50 | 4400,00 | 6599,49  | 8798,99  |
|        | 3  | 1467,33 | 2933,66 | 4400,00  | 5866,33  |
|        | 4  | 1100,75 | 2200,50 | 3300,25  | 4400,00  |
|        | 5  | 880,80  | 1760,60 | 2640,40  | 3520,20  |
|        | 6  | 734,17  | 1467,33 | 2200,50  | 2933,66  |
|        | 7  | 629,43  | 1257,86 | 1886,28  | 2514,71  |
|        | 8  | 550,87  | 1100,75 | 1650,62  | 2200,50  |
|        | 9  | 489,78  | 978,55  | 1467,33  | 1956,11  |
|        | 10 | 440,90  | 880,80  | 1320,70  | 1760,60  |

37TD-L344P  
MW 4425,98

|        |    | Monomer | Dimer   | Trimer   | Tetramer |
|--------|----|---------|---------|----------|----------|
| Charge | 1  | 4426,98 | 8852,96 | 13278,94 | 17704,92 |
|        | 2  | 2213,99 | 4426,98 | 6639,97  | 8852,96  |
|        | 3  | 1476,33 | 2951,65 | 4426,98  | 5902,31  |
|        | 4  | 1107,50 | 2213,99 | 3320,49  | 4426,98  |
|        | 5  | 886,20  | 1771,39 | 2656,59  | 3541,78  |
|        | 6  | 738,66  | 1476,33 | 2213,99  | 2951,65  |
|        | 7  | 633,28  | 1265,57 | 1897,85  | 2530,13  |
|        | 8  | 554,25  | 1107,50 | 1660,74  | 2213,99  |
|        | 9  | 492,78  | 984,55  | 1476,33  | 1968,10  |
|        | 10 | 443,60  | 886,20  | 1328,79  | 1771,39  |

**Table S3.** Masses over charges (m/z) of the 37TDs in monomeric, dimeric, trimeric, and tetrameric states.

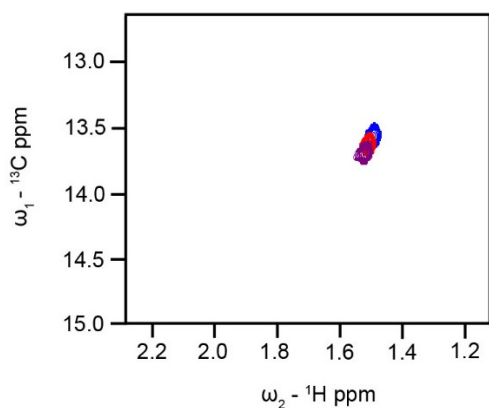

[37TD-WT] = 20  $\mu$ M, T= 25  $^{\circ}$ C  
 [37TD-WT] = 20  $\mu$ M, T= 32  $^{\circ}$ C  
 [37TD-WT] = 20  $\mu$ M, T= 40  $^{\circ}$ C

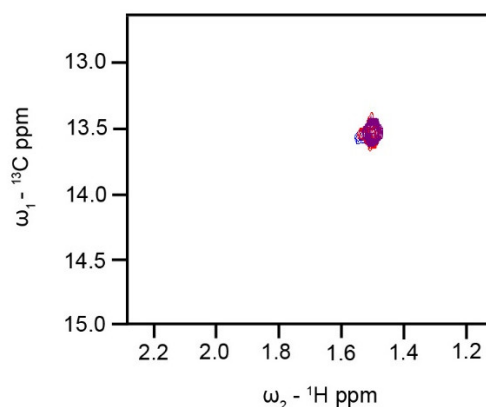

[37TD-WT] = 20  $\mu$ M, pH 5  
 [37TD-WT] = 20  $\mu$ M, pH 7  
 [37TD-WT] = 20  $\mu$ M, pH 8

**Figure S25.** 2D  $^1\text{H}$ , $^{13}\text{C}$  HSQC spectra of 37TD-WT at different pH and temperature. The concentrations refer to the monomer. All the samples were dissolved in  $\text{D}_2\text{O}$ , pH 7, and all the spectra recorded at 25  $^{\circ}\text{C}$  unless otherwise indicated.

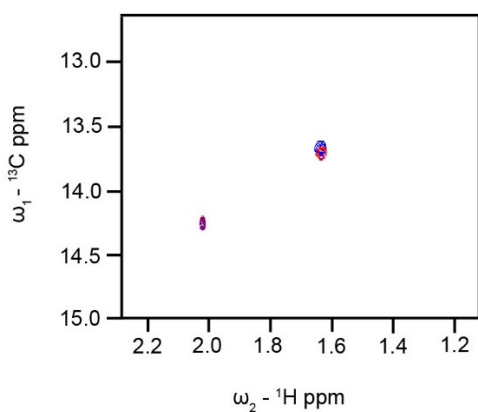

[37TD-R337H] = 20  $\mu$ M, T= 25  $^{\circ}$ C  
 [37TD-R337H] = 20  $\mu$ M, T= 32  $^{\circ}$ C  
 [37TD-R337H] = 20  $\mu$ M, T= 40  $^{\circ}$ C

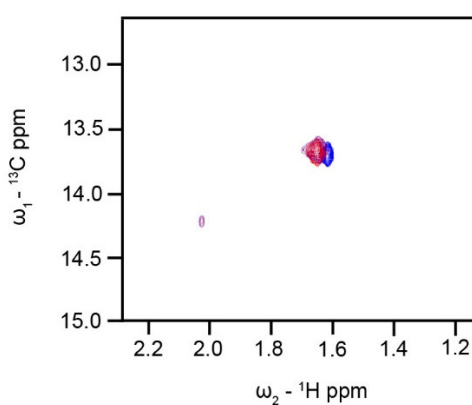

[37TD-R337H] = 20  $\mu$ M, pH 5  
 [37TD-R337H] = 20  $\mu$ M, pH 7  
 [37TD-R337H] = 20  $\mu$ M, pH 8

**Figure S26.** 2D  $^1\text{H}$ , $^{13}\text{C}$  HSQC spectra of 37TD-R337H at different pH and temperature. The concentrations refer to the monomer. All the samples were dissolved in  $\text{D}_2\text{O}$ , pH 7, and all the spectra recorded at 25  $^{\circ}\text{C}$  unless otherwise indicated.

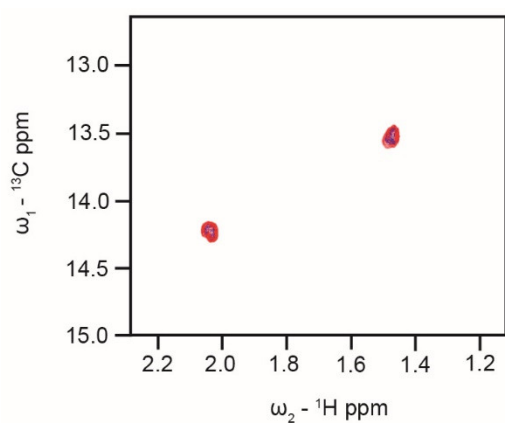

[37TD-D352H] = 100  $\mu$ M, T= 25  $^{\circ}$ C

[37TD-D352H] = 20  $\mu$ M, T= 25  $^{\circ}$ C

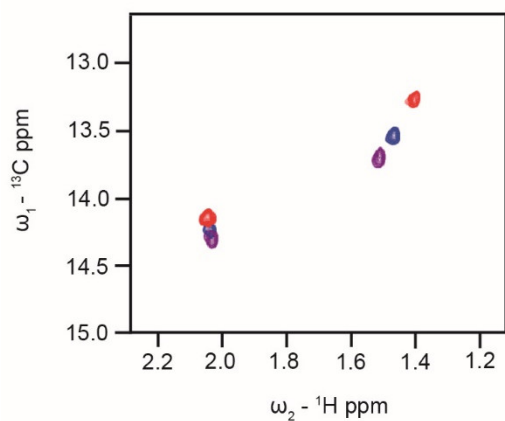

[37TD-D352H] = 100  $\mu$ M, T= 25  $^{\circ}$ C

[37TD-D352H] = 100  $\mu$ M, T= 5  $^{\circ}$ C

[37TD-D352H] = 20  $\mu$ M, T= 40  $^{\circ}$ C

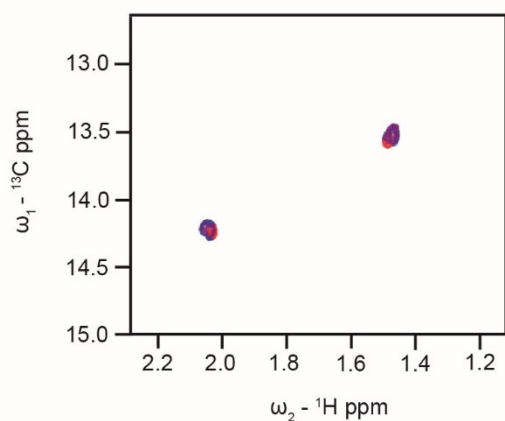

[37TD-D352H] = 20  $\mu$ M, pH 7

[37TD-D352H] = 20  $\mu$ M, pH 5

[37TD-D352H] = 20  $\mu$ M, pH 8

**Figure S27.** 2D  $^1\text{H}$ , $^{13}\text{C}$  HSQC spectra of 37TD-D352H at different sample concentration, temperature and pH. The concentrations refer to the monomer. All the samples were dissolved in  $\text{D}_2\text{O}$ , pH 7, and all the spectra recorded at 25  $^{\circ}\text{C}$  unless otherwise indicated.

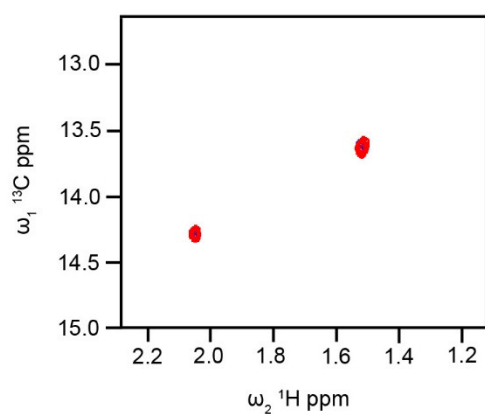

[37TD-R342L]= 75  $\mu$ M, T = 25  $^{\circ}$ C

[37TD-R342L]= 20  $\mu$ M, T = 25  $^{\circ}$ C

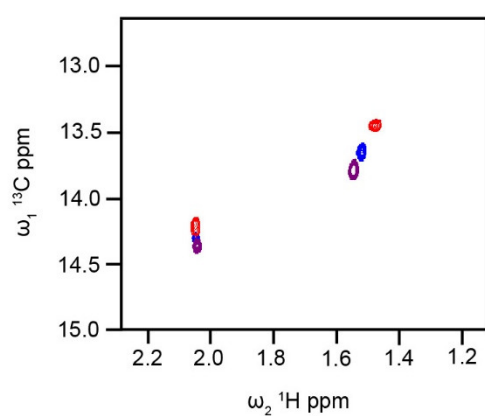

[37TD-R342L]= 75  $\mu$ M, T = 25  $^{\circ}$ C

[37TD-R342L]= 75  $\mu$ M, T = 5  $^{\circ}$ C

[37TD-R342L]= 20  $\mu$ M, T = 40  $^{\circ}$ C

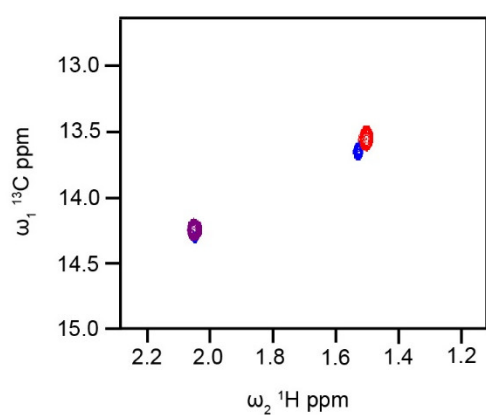

[37TD-R342L]= 75  $\mu$ M, T = 25  $^{\circ}$ C

[37TD-WT]= 100  $\mu$ M, T = 25  $^{\circ}$ C

[37TD-L344P]= 100  $\mu$ M, T = 25  $^{\circ}$ C

**Figure S28.** 2D  $^1\text{H}$ ,  $^{13}\text{C}$  HSQC spectra of 37TD-R342L at different sample concentration and temperature. The concentrations refer to the monomer. All the samples were dissolved in  $\text{D}_2\text{O}$ , pH 7, and all the spectra recorded at 25  $^{\circ}\text{C}$  unless otherwise indicated.

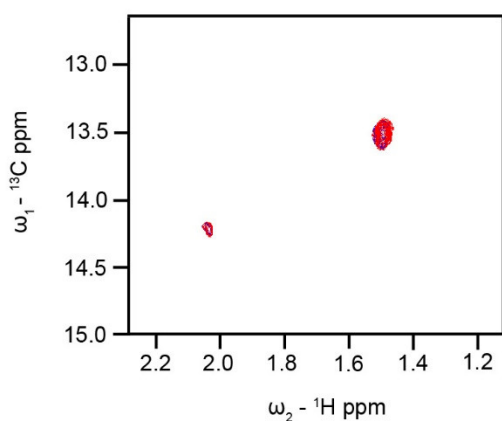

[37TD-T329I] = 100 μM, T= 25 °C

[37TD-T329I] = 20 μM, T= 25 °C

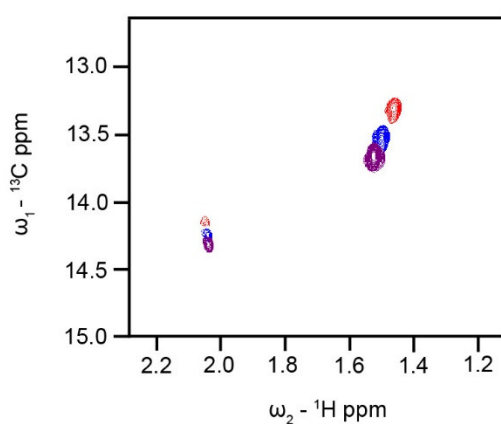

[37TD-T329I] = 100 μM, T= 25 °C

[37TD-T329I] = 100 μM, T= 5 °C

[37TD-T329I] = 20 μM, T= 40 °C

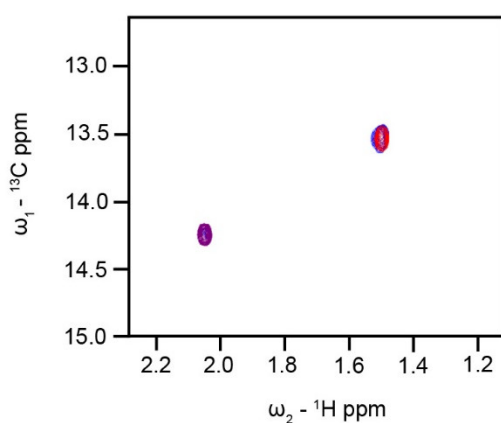

[37TD-T329I] = 100 μM, T= 25 °C

[37TD-WT] = 100 μM, T= 25 °C

[37TD-L344P] = 100 μM, T= 25 °C

**Figure S29.** 2D  $^1\text{H}$ ,  $^{13}\text{C}$  HSQC spectra of 37TD-T329I at different sample concentration and temperature. The concentrations refer to the monomer. All the samples were dissolved in  $\text{D}_2\text{O}$ , pH 7, and all the spectra recorded at 25 °C unless otherwise indicated.



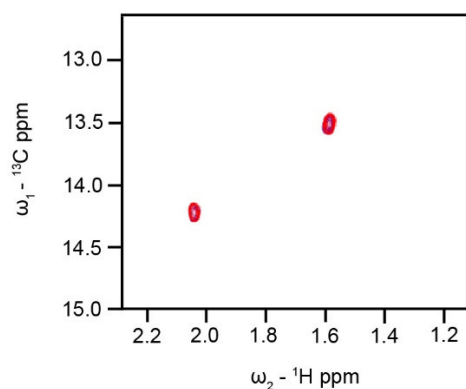

[37TD-L344R] = 100  $\mu$ M, T= 25  $^{\circ}$ C  
 [37TD-L344R] = 20  $\mu$ M, T= 25  $^{\circ}$ C

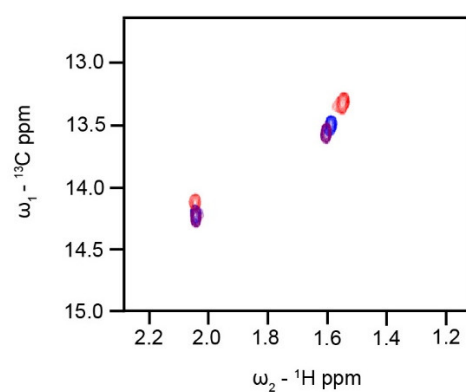

[37TD-L344R] = 100  $\mu$ M, T= 25  $^{\circ}$ C  
 [37TD-L344R] = 100  $\mu$ M, T= 5  $^{\circ}$ C  
 [37TD-L344R] = 20  $\mu$ M, T= 32  $^{\circ}$ C

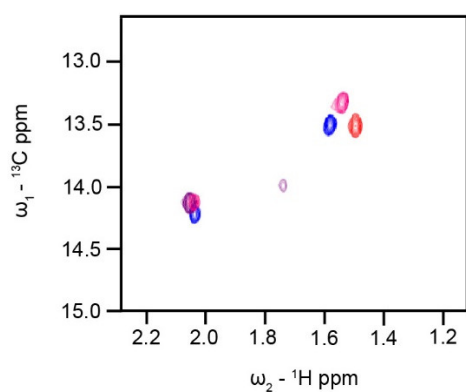

[37TD-L344R] = 100  $\mu$ M, T= 25  $^{\circ}$ C  
 [37TD-WT] = 100  $\mu$ M, T= 25  $^{\circ}$ C  
 [37TD-L344P] = 100  $\mu$ M, T= 5  $^{\circ}$ C  
 [37TD-L344R] = 100  $\mu$ M, T= 5  $^{\circ}$ C

**Figure S30.** 2D  $^1\text{H}$ ,  $^{13}\text{C}$  HSQC spectra of 37TD-L344R at different sample concentration and temperature. The concentrations refer to the monomer. All the samples were dissolved in  $\text{D}_2\text{O}$ , pH 7, and all the spectra recorded at 25  $^{\circ}\text{C}$  unless otherwise indicated.

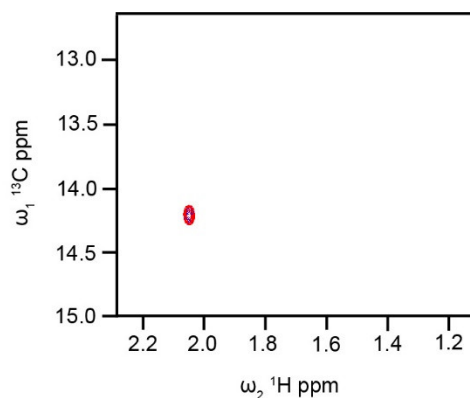

[37TD-L344P] = 100  $\mu$ M, T= 25  $^{\circ}$ C

[37TD-L344P] = 20  $\mu$ M, T= 25  $^{\circ}$ C

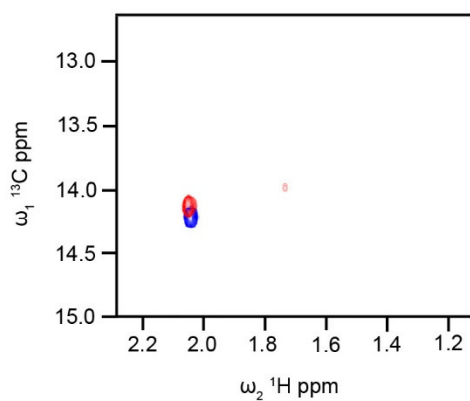

[37TD-L344P] = 20  $\mu$ M, T= 25  $^{\circ}$ C

[37TD-L344P] = 20  $\mu$ M, T= 5  $^{\circ}$ C

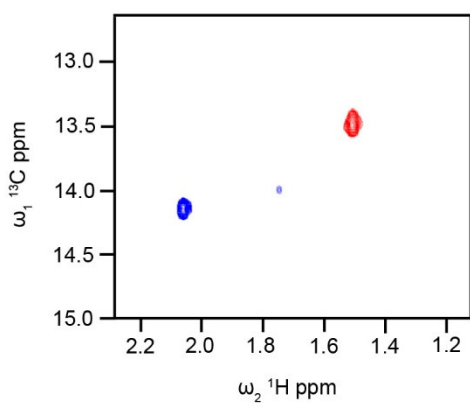

[37TD-L344P] = 20  $\mu$ M, T= 5  $^{\circ}$ C

[37TD-WT] = 20  $\mu$ M, T= 25  $^{\circ}$ C

**Figure S31.** 2D  $^1\text{H}$ ,  $^{13}\text{C}$  HSQC spectra of 37TD-L344P at different sample concentration and temperature. The concentrations refer to the monomer. All the samples were dissolved in  $\text{D}_2\text{O}$ , pH 7, and all the spectra recorded at 25  $^{\circ}\text{C}$  unless otherwise indicated.

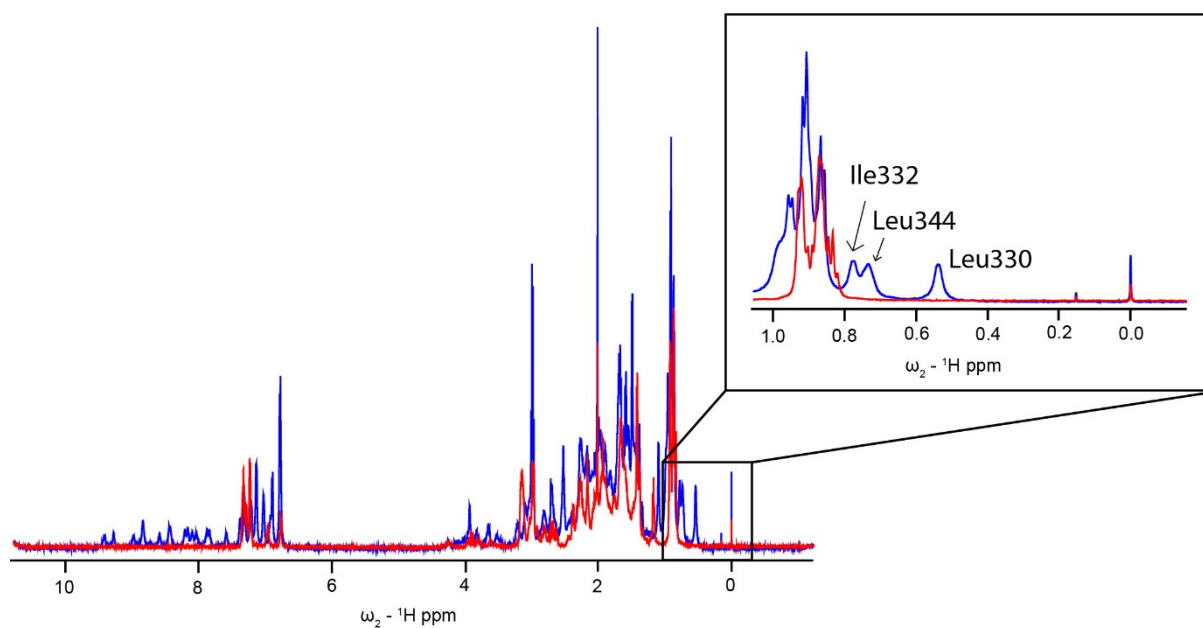

**Figure S32.** 1D  $^1\text{H}$  spectra of 37TD-WT (blue) and 37TD-L344P (red) dissolved in  $\text{D}_2\text{O}$ , pH 7, at a monomer concentration of 100  $\mu\text{M}$ . The spectra are recorded at 25  $^\circ\text{C}$ .

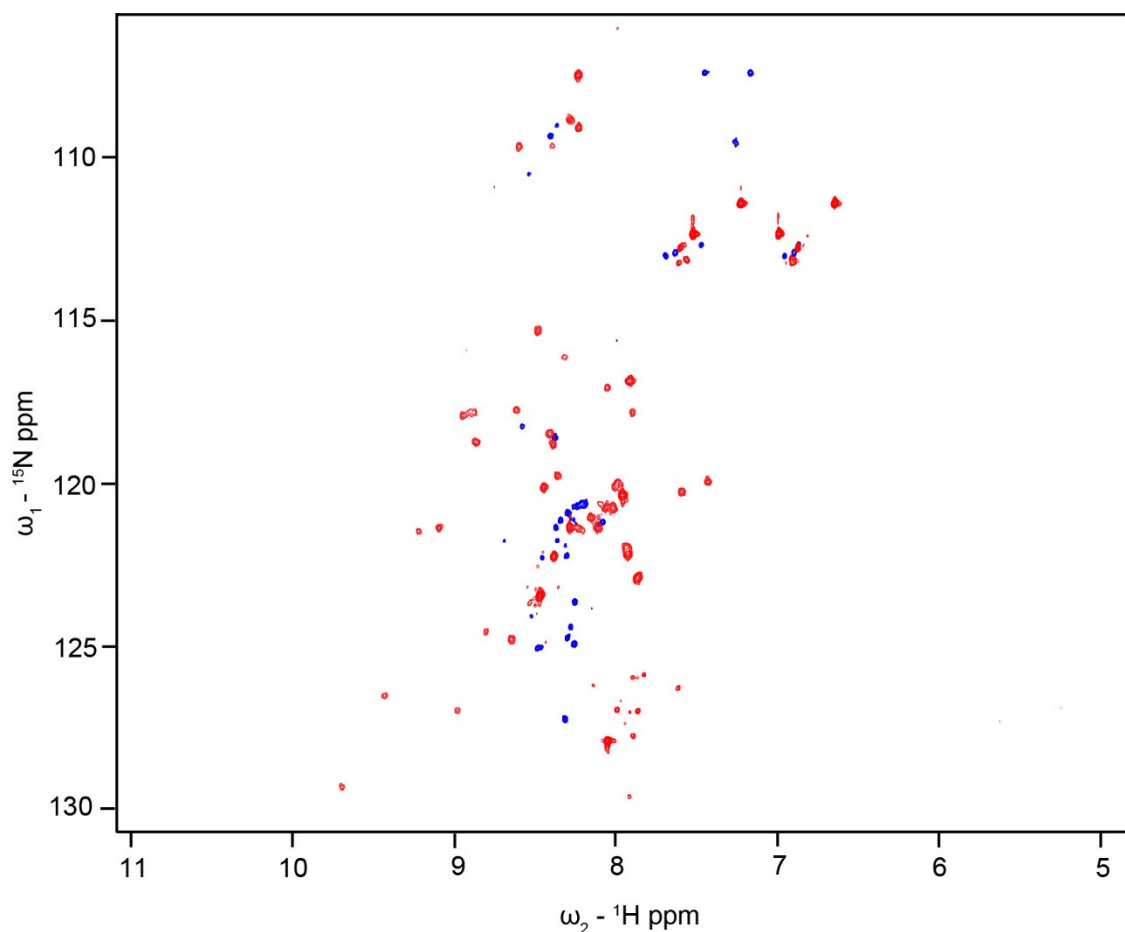

[37TD-L344P] = 500  $\mu$ M, T= 15  $^{\circ}$ C

[R337H] = 250  $\mu$ M, T= 25  $^{\circ}$ C

**Figure S33.** In blue,  $^1\text{H},^{15}\text{N}$  HSQC spectrum of 37TD-L344P dissolved in  $\text{D}_2\text{O}$ , pH 7. The signals of the spectrum are due to the natural abundance of  $^{15}\text{N}$ . For comparison, in red,  $^1\text{H},^{15}\text{N}$  HSQC spectrum of a reference R337H, res 311-367, expressed in *E. coli* and enriched in  $^{15}\text{N}$  [52]. R337H was dissolved in 10 mM sodium phosphate buffer, pH 7. The concentrations refer to the monomer.

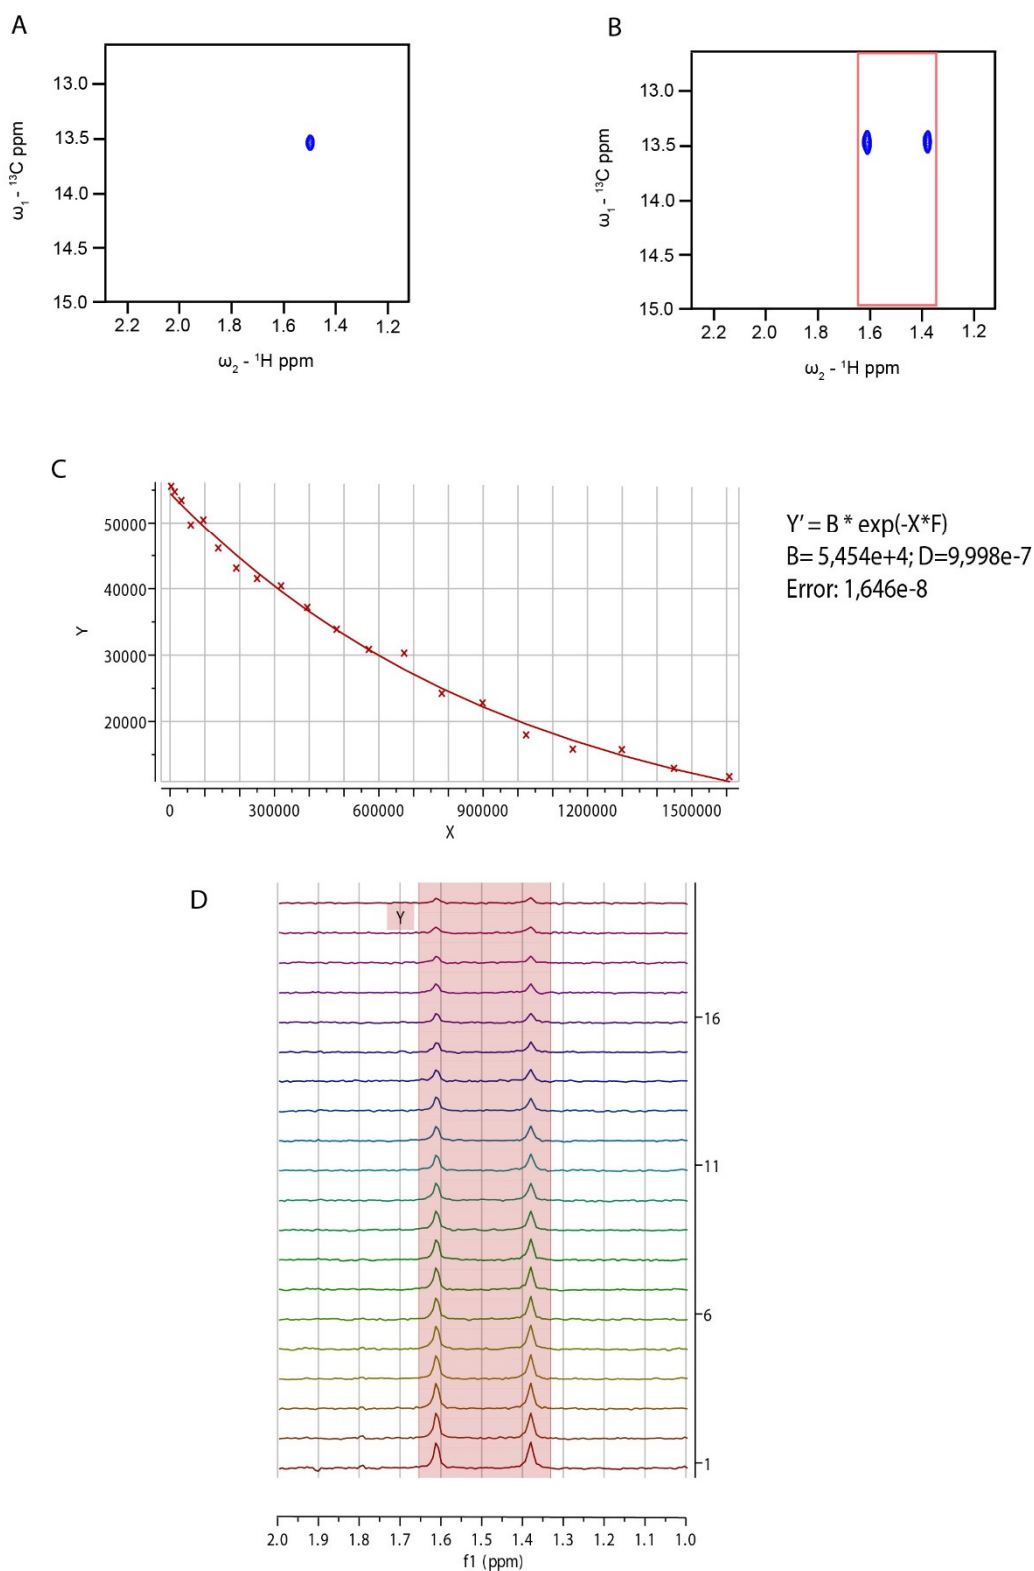

**Figure S34.** X-STE NMR diffusion of 37TD-WT monitoring the size of the species containing  $^{13}\text{C}$ -attached  $^1\text{H}$  nuclei. (A) 2D  $^1\text{H}$ ,  $^{13}\text{C}$ -HSQC. (B)  $^{13}\text{C}$ -coupled 2D  $^1\text{H}$ ,  $^{13}\text{C}$ -HSQC illustrating the splitting of the Met340  $^1\text{H}^\epsilon$  signal ( $^1J_{\text{HC}} \approx 140$  Hz). (C,D) X-STE NMR diffusion experiments. The decay in signal intensity of the Met340  $^1\text{H}^\epsilon$  signal (panel D) was fitted to a mono exponential function to obtain the coefficient diffusion. X-STE experiments were acquired without decoupling and the Met340  $^1\text{H}^\epsilon$  signal splits into a doublet ( $^1J_{\text{HC}} \approx 140$  Hz). The spectra were recorded at 25 °C using a monomer concentration of 100  $\mu\text{M}$  ( $\text{D}_2\text{O}$ , pH 7).

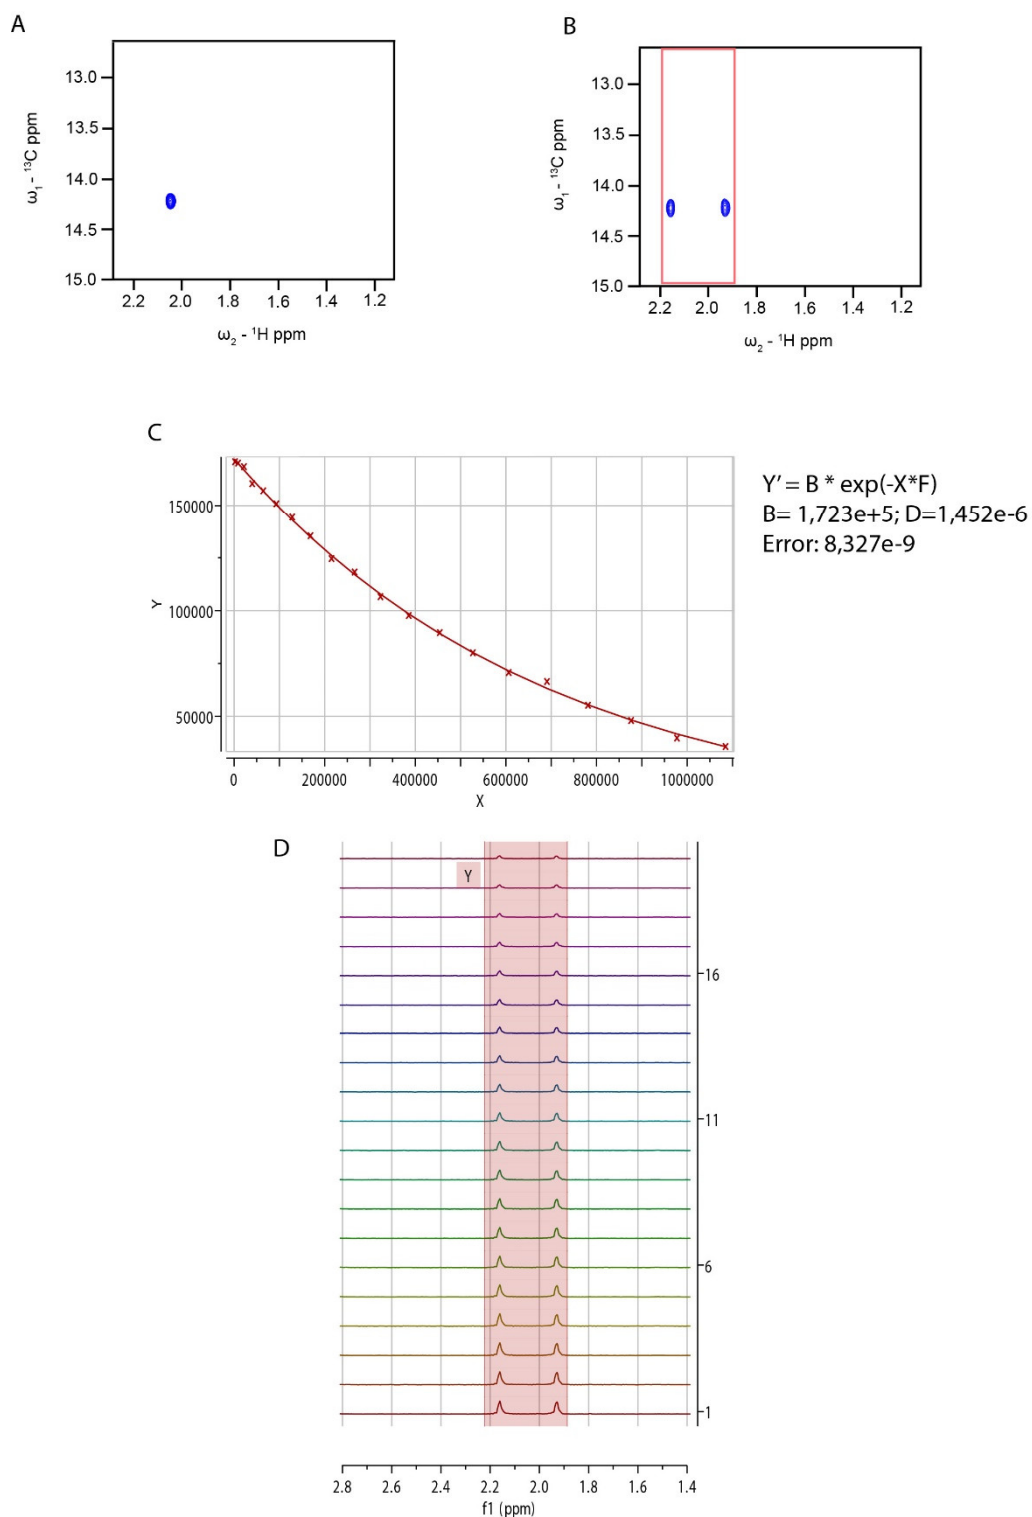

**Figure S35.** X-STE NMR diffusion of 37TD-L344P monitoring the size of the species containing  ${}^{13}\text{C}$ -attached  ${}^1\text{H}$  nuclei. (A) 2D  ${}^1\text{H}$ , ${}^{13}\text{C}$ -HSQC. (B)  ${}^{13}\text{C}$ -coupled 2D  ${}^1\text{H}$ , ${}^{13}\text{C}$ -HSQC illustrating the splitting of the Met340  ${}^1\text{H}^\epsilon$  signal ( ${}^1J_{\text{HC}} \approx 140$  Hz). (C,D) X-STE NMR diffusion experiments. The decay in signal intensity of the Met340  ${}^1\text{H}^\epsilon$  signal (panel D) was fitted to a mono exponential function to obtain the coefficient diffusion. X-STE experiments were acquired without decoupling and the Met340  ${}^1\text{H}^\epsilon$  signal splits into a doublet ( ${}^1J_{\text{HC}} \approx 140$  Hz). The spectra were recorded at 25 °C using a monomer concentration of 100  $\mu\text{M}$  ( $\text{D}_2\text{O}$ , pH 7).

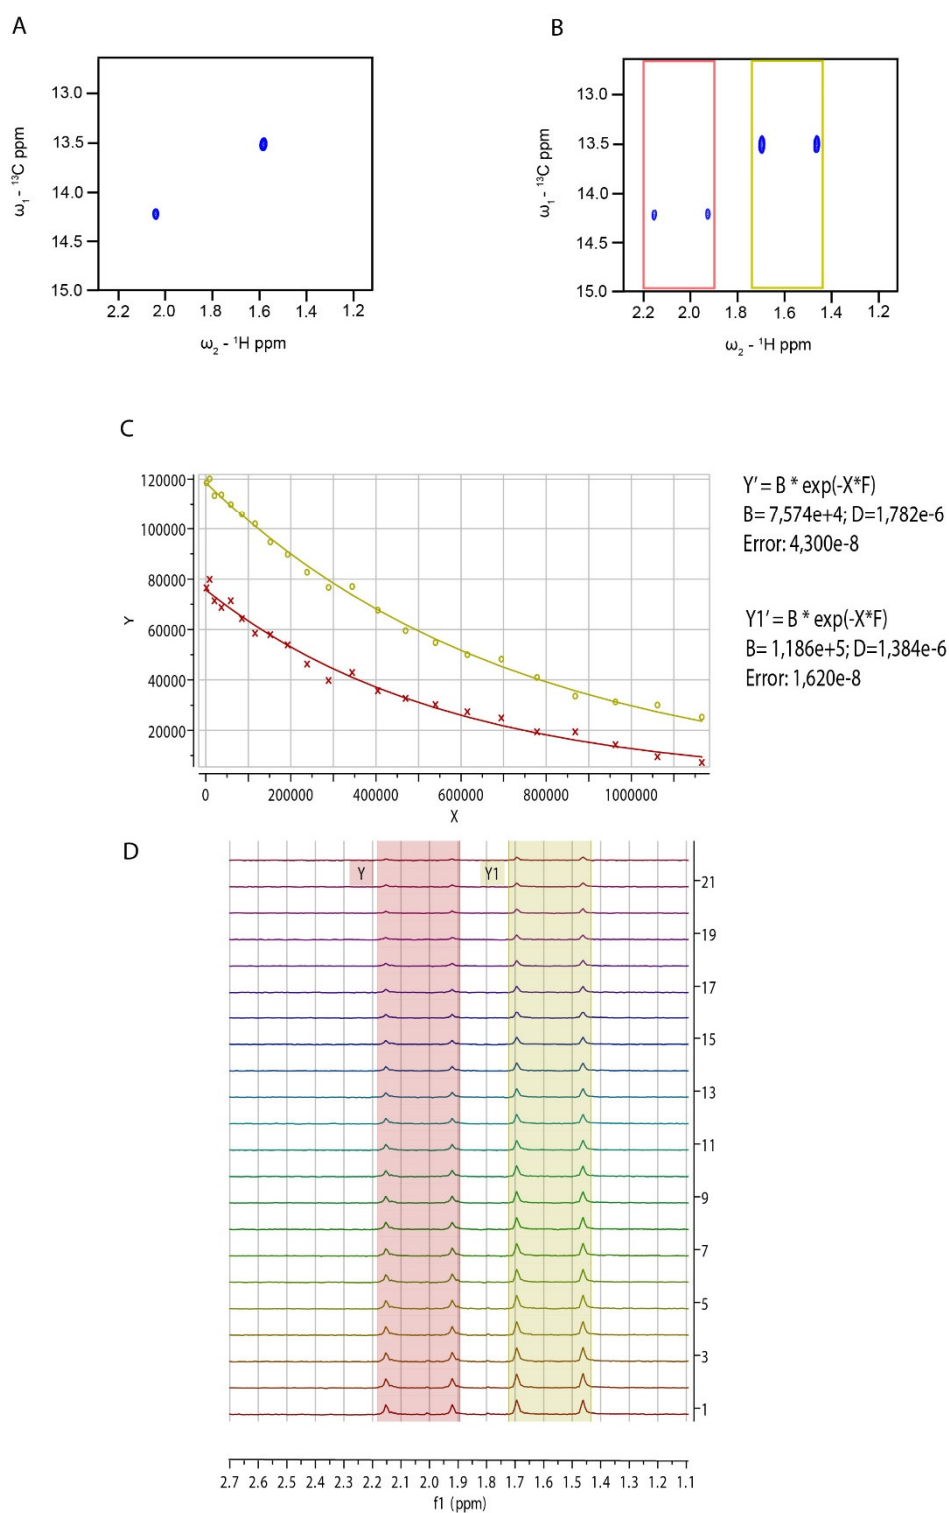

**Figure S36.** X-STE NMR diffusion of 37TD-L344R monitoring the size of the species containing  ${}^{13}\text{C}$ -attached  ${}^1\text{H}$  nuclei. (A) 2D  ${}^1\text{H}, {}^{13}\text{C}$ -HSQC. (B)  ${}^{13}\text{C}$ -coupled 2D  ${}^1\text{H}, {}^{13}\text{C}$ -HSQC illustrating the splitting of the Met340  ${}^1\text{H}_\epsilon$  signal ( ${}^1J_{\text{HC}} \approx 140$  Hz). (C,D) X-STE NMR diffusion experiments. The decay in signal intensity of the Met340  ${}^1\text{H}_\epsilon$  signal (panel D) was fitted to a mono exponential function to obtain the coefficient diffusion. X-STE experiments were acquired without decoupling and the Met340  ${}^1\text{H}_\epsilon$  signal splits into a doublet ( ${}^1J_{\text{HC}} \approx 140$  Hz). The spectra were recorded at  $25^\circ\text{C}$  using a monomer concentration of  $100\ \mu\text{M}$  ( $\text{D}_2\text{O}$ , pH 7).
